1 **Global and context-specific transcriptional consequences of oncogenic Fbw7 mutations**

2

3 H. Nayanga Thirimanne<sup>1,2,3</sup>, Feinan Wu<sup>4</sup>, Derek H Janssens<sup>5</sup>, Jherek Swanger<sup>2,3</sup>, Heather M

4 Feldman<sup>3</sup>, Robert A Amezcua<sup>6</sup>, Raphael Gottardo<sup>6</sup>, Patrick J Paddison<sup>3</sup>, Steven Henikoff<sup>5,7,8\*</sup>,

5 Bruce E Clurman<sup>1,2,3,9\*</sup>.

6

7 1 Department of Pathology, University of Washington, Seattle WA 98109

8 2 Clinical Research Division, Fred Hutchinson Cancer Research Center, Seattle, WA 98109

9 3 Human Biology Division, Fred Hutchinson Cancer Research Center, Seattle, WA 98109

10 4 Genomics and Bioinformatics Resource, Fred Hutchinson Cancer Research Center, Seattle,

11 WA 98109

12 5 Basic Science Division, Fred Hutchinson Cancer Research Center, Seattle, WA 98109

13 6 Vaccine and Infectious Disease Division, Fred Hutchinson Cancer Research Center, Seattle,

14 WA 98109

15 7 Genome Sciences, University of Washington, Seattle WA 98109

16 8 Howard Hughes Medical Institute, Chevy Chase, MD, USA

17 9 Department of Medicine, University of Washington, Seattle WA 98109

18 \* Corresponding Authors

19 Correspondence should be addressed to:

20 Bruce E Clurman, Email: [bclurman@fredhutch.org](mailto:bclurman@fredhutch.org), phone: 206-667-4524

21 **Abstract**

22 Fbw7 is a ubiquitin ligase substrate receptor that targets proteins for proteasomal degradation.  
23 Most known Fbw7 substrates are transcription factors (TFs) and many are also oncoproteins  
24 (e.g., c-Myc, c-Jun, Notch). Fbw7 is an important tumor suppressor and *FBXW7* mutations drive  
25 tumorigenesis through activation of oncogenic Fbw7 substrates. Defining the mechanisms of  
26 Fbw7-associated tumorigenesis is critical for developing targeted therapies. We thus determined  
27 the transcriptional consequences of oncogenic Fbw7 mutations by studying isogenic colorectal  
28 cancer cell lines with engineered *FBXW7* null and heterozygous missense mutations. We used an  
29 integrated approach employing RNA-Seq and high-resolution mapping (CUT&RUN) of histone  
30 modifications and TF occupancy (c-Jun and c-Myc) to examine the combinatorial effects of mis-  
31 regulated Fbw7 substrates. Fbw7 mutations caused widespread transcriptional changes  
32 associated with active chromatin and altered TF occupancy at distal regulatory regions. Some  
33 regulatory changes were common to both *FBXW7*-mutant cell lines whereas others  
34 were *FBXW7* mutation-specific. By comparing c-Jun and c-Myc binding sites, we also identified  
35 co-regulated elements, suggesting that Fbw7 substrates may have synergistic effects. One co-  
36 regulated gene was *CIITA*, a master regulator of MHC Class II gene expression, and Fbw7 loss  
37 increased *CIITA* and MHC Class II gene expression in colorectal cancer cells. Fbw7 mutations  
38 were also correlated with increased *CIITA* expression in TCGA colorectal tumors and cell lines,  
39 which may have immunologic implications for progression and treatment of Fbw7-associated  
40 cancers. This integrative analysis provides a framework for understanding normal and neoplastic  
41 context-specific Fbw7 functions.

42

## 43 **Introduction**

44 SCFs (Skp1-Cul1-F-box protein) are multi-subunit ubiquitin ligases that target proteins  
45 for degradation through the conjugation of polyubiquitin chains that signal their destruction by  
46 the proteasome (Deshaies & Joazeiro, 2009; Lee & Diehl, 2014). F-box proteins are SCF  
47 substrate receptors and often target proteins for ubiquitylation in response to substrate  
48 modifications (Skaar et al., 2013; Yumimoto & Nakayama, 2020). The Fbw7 F-box protein is  
49 encoded by the *FBXW7* gene and binds to substrates after they become phosphorylated within  
50 motifs, termed CDC4-phosphodegrons (CPDs), that mediate high-affinity interactions with the  
51 Fbw7  $\beta$ -propeller (R. J. Davis et al., 2014; Hao et al., 2007; Nash et al., 2001; Orlicky et al.,  
52 2003; Yumimoto & Nakayama, 2020). Fbw7 also contains a dimerization domain and an F-box  
53 that binds to the SCF complex, and Fbw7 brings phosphorylated substrates into proximity with  
54 the remainder of the SCF complex.

55 Approximately 30 Fbw7 substrates are known. Most are broadly acting transcription  
56 factors (TFs) that control processes such as proliferation, differentiation, and metabolism, and  
57 include c-Myc, Notch, c-Jun, PGC-1 $\alpha$ , SREBP1/2, and many others (Cremona et al., 2016; R. J.  
58 Davis et al., 2014; Welcker & Clurman, 2008; Yumimoto & Nakayama, 2020). Fbw7 also  
59 targets proteins that are not TFs, such as cyclin E and MCL-1. Fbw7's cellular functions reflect  
60 the combined regulation of its many substrates. Because different cell types express different  
61 subsets of substrates that are targeted for degradation by Fbw7 only after they acquire specific  
62 phosphorylations, the contribution of individual substrates to Fbw7's overall function is highly  
63 context dependent. In most known cases, glycogen synthase kinase 3 $\beta$  (GSK-3 $\beta$ ) is one of the  
64 CPD kinases, suggesting that Fbw7 coordinately couples the activity of its substrates to  
65 mitogenic signaling pathways. In addition, some TFs are phosphorylated when they are

66 associated with their target genes (Fryer et al., 2004; Punga et al., 2006), highlighting another  
67 constraint to their susceptibility to Fbw7-mediated degradation. This complexity has made it  
68 difficult to fully comprehend Fbw7 function, and this is compounded by the fact that many  
69 substrates are master TFs that regulate complex gene networks themselves.

70         Some Fbw7 substrates are critical oncoproteins that drive tumorigenesis, such as c-Myc,  
71 c-Jun, and Notch1. Fbw7 loss in tumors deregulates these oncoproteins and *FBXW7* is a  
72 commonly mutated tumor suppressor gene (R. J. Davis et al., 2014; Shimizu et al., 2018; Tan et  
73 al., 2008; Yeh et al., 2018; Yumimoto & Nakayama, 2020). The most frequent *FBXW7*  
74 mutations are heterozygous missense mutations, termed Fbw7<sup>R/+</sup>, that target one of three arginine  
75 residues that form Fbw7's CPD-binding pocket. Fbw7<sup>R/+</sup> weaken substrate binding and are  
76 thought to act as dominant negatives by forming heterodimers with WT-Fbw7, which normally  
77 functions as a dimer (Hao et al., 2007; Welcker et al., 2013; Welcker & Clurman, 2007). While  
78 Fbw7<sup>R/+</sup> mutations are common, Fbw7<sup>+/-</sup> mutations are not, strongly suggesting that Fbw7<sup>R/+</sup>  
79 mutations are not simply loss-of-function alleles and that Fbw7<sup>R/+</sup> proteins have unique  
80 oncogenic activity (R. J. Davis et al., 2014). However, the mechanisms that drive Fbw7<sup>R/+</sup>  
81 selection in cancers are still poorly understood. One model, termed “just enough”, posits that  
82 Fbw7<sup>R/+</sup> only partially impair Fbw7 and inactivate its tumor suppressor functions but preserve  
83 other required or beneficial Fbw7 activities (H. Davis & Tomlinson, 2012). Unlike Fbw7<sup>+/-</sup>  
84 mutations, canonical bi-allelic loss of function Fbw7<sup>-/-</sup> mutations (e.g., nonsense, truncations,  
85 frame shifts, deletions) do occur. Different cancers have different mutational spectra; T-cell  
86 acute lymphocytic leukemias (T-ALLs) have almost exclusively Fbw7<sup>R/+</sup> whereas colorectal  
87 cancers have both Fbw7<sup>R/+</sup> and Fbw7<sup>-/-</sup> mutations. The mechanisms through which these

88 different mutations promote tumorigenesis remain poorly defined, yet this is critical to  
89 understanding tumor suppression by Fbw7 and developing targeted therapeutic strategies.

90 To address these questions, we determined the global transcriptional consequences of  
91 oncogenic Fbw7 mutations by using RNA-Seq and high-resolution mapping of histone  
92 modifications and oncogenic TF (c-Jun and c-Myc, here onwards Jun and Myc) occupancy in an  
93 isogenic panel of colorectal cancer cells with engineered Fbw7<sup>-/-</sup> and Fbw7<sup>R/+</sup> mutations. Both  
94 mutations caused widespread but highly context-specific transcriptional changes associated with  
95 active chromatin and altered TF occupancy. Overall, the transcriptional effects of Fbw7<sup>-/-</sup> were  
96 greater than Fbw7<sup>R/+</sup>. We found evidence supporting the “just enough” model of Fbw7<sup>R/+</sup> (sites  
97 shared by both mutations, but less impacted by Fbw7<sup>R/+</sup>), as well as outcomes specific to either  
98 the Fbw7<sup>-/-</sup> or Fbw7<sup>R/+</sup> mutation.

99 While both mutations only impacted a subset of mapped loci, we found sites at which  
100 both Jun and Myc were co-regulated by Fbw7. One co-regulated gene was *CIITA* (Class II Major  
101 Histocompatibility Complex Transactivator), the master regulator of MHC class II gene  
102 expression (Masternak et al., 2000; Reith et al., 2005). Fbw7 loss caused increased MHC class II  
103 gene expression associated with increased Jun and Myc occupancy upstream of *CIITA*. Analyses  
104 of TCGA colorectal cancer and cell lines further correlated Fbw7 mutations with MHC Class II  
105 gene expression, which may have important prognostic and therapeutic implications for Fbw7-  
106 associated colorectal cancers. Because Fbw7 normally regulates neural stem cells (NSCs)  
107 (Hoeck et al., 2010) and Fbw7 loss occurs in glioblastoma (Hagedorn et al., 2007), we similarly  
108 studied NSCs in which Fbw7 was acutely deleted, which revealed transcriptional consequences  
109 of Fbw7 loss that closely mirrored the results obtained in the isogenic cell panel, including

110 increased CIITA expression. Overall, these data establish a framework for understanding the  
111 mechanisms of Fbw7 tumor suppression.

112

## 113 **Results**

### 114 ***FBXW7* null and missense mutations lead to distinct gene expression profiles.**

115 Hct116 cells were previously engineered to mutate the endogenous wild-type (WT)  
116 *FBXW7* locus to either a heterozygous Fbw7<sup>R505C/+</sup> (Fbw7<sup>R/+</sup>) or a homozygous null (Fbw7<sup>-/-</sup>)  
117 mutation (Figure 1A) (R. J. Davis et al., 2018; Grim et al., 2008). We performed RNA  
118 sequencing to identify the global transcriptome changes arising in response to these Fbw7  
119 mutations. Principal component analysis (PCA) revealed that the Fbw7<sup>R/+</sup> and Fbw7<sup>-/-</sup> cells  
120 clustered apart from one another, indicating that the two *FBXW7* mutations have distinct effects  
121 on the transcriptome relative to WT cells (Figure 1 – figure supplement 1). Compared with WT  
122 cells, 11.3% and 5.4% of protein-coding genes were differentially expressed in Fbw7<sup>-/-</sup> and  
123 Fbw7<sup>R/+</sup> cells, respectively. Some genes were differentially expressed in both Fbw7<sup>-/-</sup> and  
124 Fbw7<sup>R/+</sup>, whereas others were uniquely deregulated by either Fbw7<sup>-/-</sup> or Fbw7<sup>R/+</sup> (Figure 1B,  
125 Figure 1 – source data 1). Hierarchical clustering of differentially expressed protein-coding  
126 genes identified genes that were: 1) upregulated (cluster 1) or downregulated (cluster 2) in just  
127 Fbw7<sup>-/-</sup> cells, 2) genes upregulated (cluster 6) and downregulated (cluster 5) in just Fbw7<sup>R/+</sup> cells,  
128 and 3) genes that show similar expression changes in response to both *FBXW7* mutations  
129 (clusters 3 and 4) (Figure 1C). Gene set enrichment analysis revealed numerous pathways  
130 enriched in the differentially expressed genes common to both types of Fbw7 mutations or  
131 uniquely to Fbw7<sup>-/-</sup> cells (Figure 1D) (E. Y. Chen et al., 2013; Kuleshov et al., 2016). The most  
132 highly enriched Gene Ontology (GO) term in Fbw7<sup>-/-</sup> cells was Major Histocompatibility

133 Complex Class II (MHC Class II) components. Some enriched terms might reflect the functions  
134 of known Fbw7 substrates, such as the regulation of cholesterol biosynthesis by the SREBP-1/2  
135 proteins (Sundqvist et al., 2005). The two distinct *FBXW7* mutations thus caused both  
136 overlapping and unique changes in global transcription.

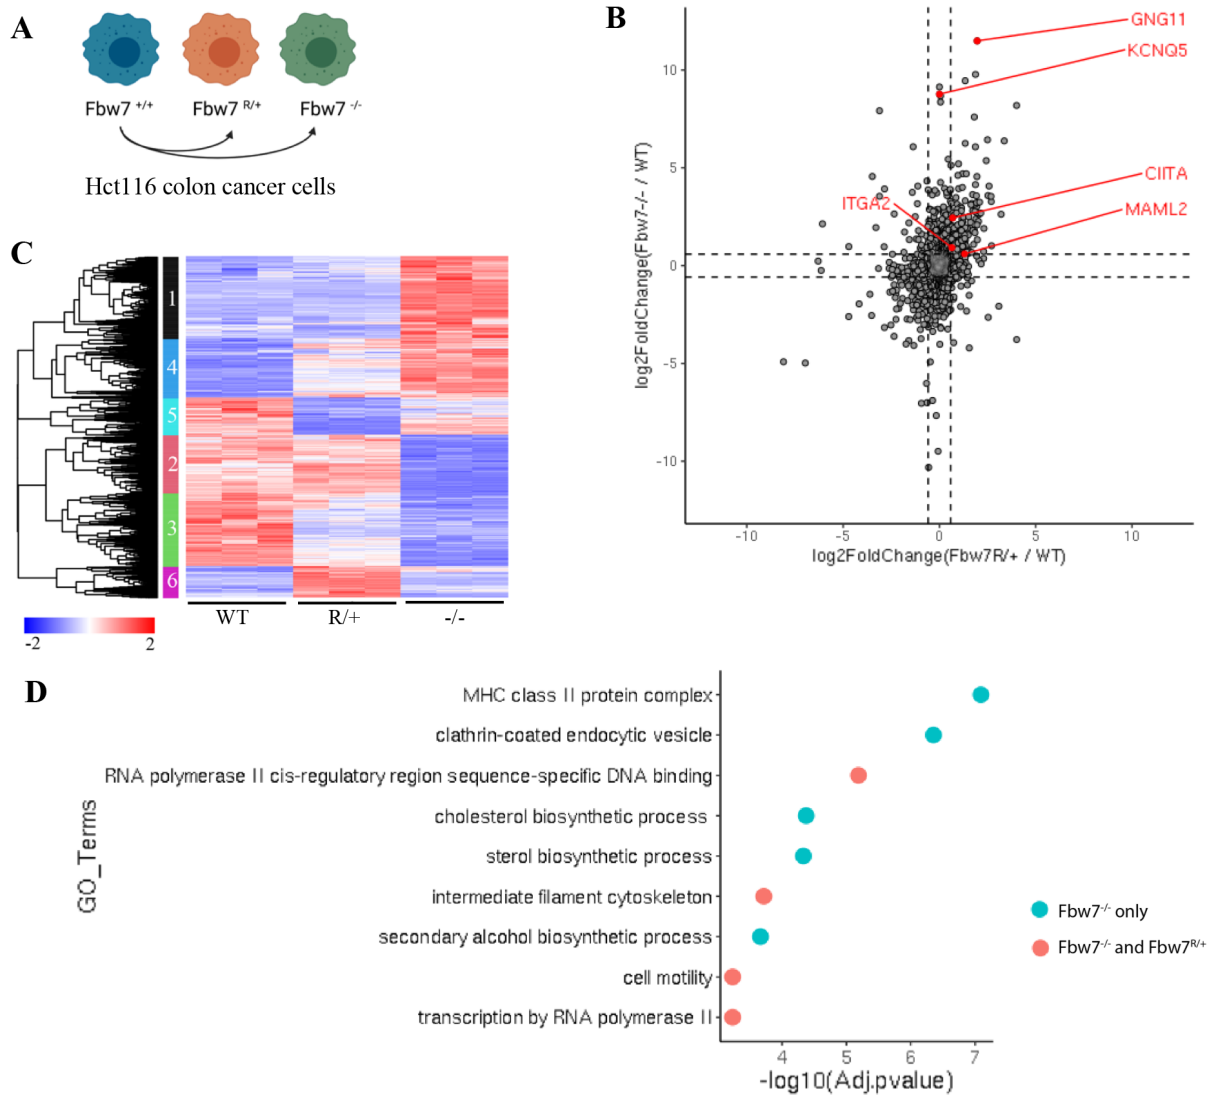

137

138 **Figure 1. RNA-Seq reveals differential gene expression in Hct116 Fbw7<sup>-/-</sup> and Fbw7<sup>R/+</sup> cells.** (A) Genetically  
 139 engineered isogenic cell lines used in the study: Hct116 wild-type (WT), Fbw7<sup>-/-</sup> and Fbw7<sup>R/+</sup>. (B) Differentially  
 140 expressed protein-coding genes (represented by each dot) in Fbw7<sup>-/-</sup> or Fbw7<sup>R/+</sup> (FDR<0.05). Dashed lines mark  
 141 log<sub>2</sub>FC=0.6. Three replicates per cell type were included. (C) Hierarchical clustering of differentially expressed  
 142 protein-coding genes. The heatmap shows the intensity of expression of each gene (y axis) for three replicates per  
 143 cell type (x axis). (D) Gene ontology terms that are enriched in gene clusters deregulated by both Fbw7<sup>-/-</sup> and  
 144 Fbw7<sup>R/+</sup> (red), and only by Fbw7<sup>-/-</sup> (blue). Detailed output of differential expression analysis, hierarchical clustering  
 145 and GO Term analysis are provided as Figure 1-source data file 1, 2 and 3 respectively. See Figure 1 – figure  
 146 supplement 1 for the PCA of Hct116 RNA-Seq.

147

148

149



## 150 **Chromatin regulation in *FBXW7* mutant cells**

151 Because Fbw7 regulates many TFs, we first looked at global changes in chromatin to  
152 determine if specific TFs targeted by Fbw7 might drive the transcriptional changes in these cells.  
153 Histone H3 lysine-27 acetylation (H3K27ac) and Histone H3 lysine-27 trimethylation  
154 (H3K27me3) provide a simple readout of transcriptionally active versus repressive chromatin,  
155 respectively (Karlič et al., 2010). We used Cleavage Under Target and Release Using Nuclease  
156 (CUT&RUN) (Janssens et al., 2018; Skene et al., 2018; Skene & Henikoff, 2017) to obtain high  
157 resolution maps of H3K27ac and H3K27me3 in each of the Hct116 cell lines (Figure 2 – figure  
158 supplement 1). As expected, the H3K27ac signal within the 2 kb region flanking the  
159 transcriptional start sites (TSSs) of genes was positively correlated with their expression ( $r =$   
160  $0.44$ ,  $p$  value  $< 2.2e-16$ ), whereas the amount of H3K27me3 was negatively correlated ( $r = -0.22$ ,  
161  $p$  value  $< 2.2e-16$ ) (Figure 2A). For example, the *GNG11* gene, whose expression is upregulated  
162 in Fbw7<sup>-/-</sup> cells, contains increased H3K27ac and decreased H3K27me3, compared with WT  
163 (Figure 1B, Figure 2B)

164 Genome-wide analysis identified sites with increased H3K27ac in *FBXW7* mutant cells  
165 (Fbw7<sup>-/-</sup>: 9.4%, Fbw7<sup>R/+</sup>: 7.6%) compared with control cells, as well as sites where H3K27ac was  
166 decreased (Fbw7<sup>-/-</sup>: 6.9%, Fbw7<sup>R/+</sup>: 4.3%) (Figure 2C, Figure 2 - source data 2). Most non-  
167 differential H3K27ac sites (those unaffected by Fbw7 status) were promoter-proximal, while loci  
168 with differential H3K27ac in either Fbw7<sup>R/+</sup> or Fbw7<sup>-/-</sup> cells fell mostly within introns or  
169 intergenic regions ( $p$  value  $< 0.0001$ , Fisher test) (Figure 2D, Figure 2 – figure supplement 2). To  
170 determine whether these differential loci result from the altered binding of known Fbw7  
171 substrates, we performed motif discovery analysis on the central 100 bp sequence of each peak.  
172 Strikingly, the AP-1 motif, which is bound by the Jun family, was found in 32% ( $p$  value  $\leq 1.8e-$

173 5) of the H3K27ac sites upregulated in *Fbw7<sup>-/-</sup>* cells (Figure 2E, Figure 2 – figure supplement  
174 3A). The AP-1 motif was also enriched in differential H3K27ac sites that were decreased in  
175 *Fbw7<sup>-/-</sup>* cells, as well as in differential H3K27c sites in *Fbw7<sup>R/+</sup>* cells. In contrast, the AP-1 site  
176 was not enriched in H3K27ac sites that were unaffected by either *FBXW7* mutation (Figure 2 –  
177 figure supplement 3B). AP-1 motif enrichment in these differential sites suggests that *Fbw7*-  
178 dependent Jun regulation may account, in part, for these changes.

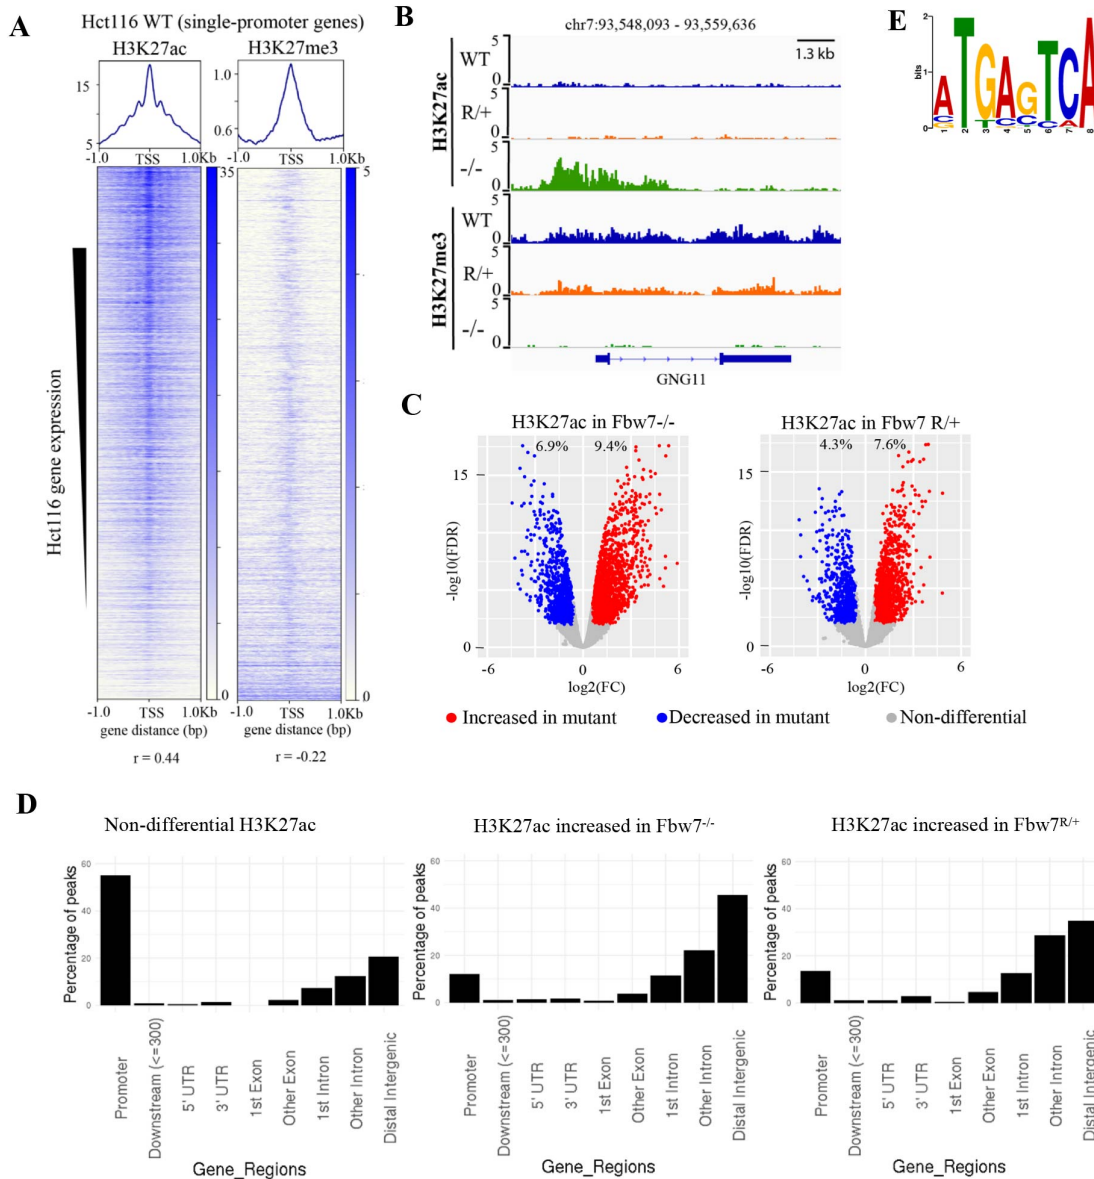

179

180 **Figure 2. Differential H3K27ac signal in Hct116 *FBXW7* mutant cells reveals genomic sites targeted by Fbw7.**

181 (A) Heatmaps showing the correlation between CUT&RUN profiles of H3K27ac and H3K27me3, and RNA-Seq in

182 Hct116 WT cells. (B) Genome browser view of H3K27ac and H3K27me3 signal from Hct116 WT, Fbw7<sup>R/+</sup> and

183 Fbw7<sup>-/-</sup> cells at a representative gene (C) Peaks with increased (red) or decreased (blue) H3K27ac signal in Hct116

184 Fbw7<sup>-/-</sup> and Fbw7<sup>R/+</sup> cells compared to WT cells. Differential sites indicated as a percent of total H3K27ac peaks in

185 Hct116 WT cells. See Figure 2 – figure supplement 1 for the correlation matrix, Figure 2 – source data 1 for a list of

186 H3K27ac differential sites and Figure 2 – source data 2 for the calculation of percentages. (D) Percentage of

187 H3K27ac peaks located within different gene regions. See Figure 2 – figure supplement 2. (E) Sequence logo for

188 AP-1 motif enriched in H3K27ac peaks increased in Fbw7<sup>-/-</sup> cells (E value = 1.6e-3). See Figure 2 – figure

189 supplement 3 for the complete MEME output and details on the FIMO analysis.

190

191 **Fbw7 preferentially regulates Jun and Myc occupancy at distal regulatory regions.**

192 Fbw7 targets some TF-substrates while they are bound to DNA, suggesting that  
193 substrates may recruit Fbw7 to chromatin (Fryer et al., 2004; Punga et al., 2006). We thus  
194 examined how mutation of the Fbw7 substrate binding domain impacts its chromatin association  
195 in Hct116 cells with endogenous heterozygous (Fbw7<sup>R/+</sup>) or homozygous (Fbw7<sup>R/R</sup>) mutations.  
196 Fbw7 was found in both the chromatin and soluble fractions of WT-Hct116 lysates, but  
197 exclusively in the soluble fraction in Fbw7<sup>R/R</sup> cells (Figure 3A). The only known consequence of  
198 Fbw7<sup>R</sup> mutations is to prevent substrate binding, and thus the loss of chromatin-associated Fbw7  
199 in Fbw7<sup>R/R</sup> cells suggests that substrate binding recruits Fbw7 to chromatin. Proteasome  
200 inhibition prevents substrate degradation and stabilizes Fbw7-substrate complexes. We found  
201 that treatment of cells with a proteasome inhibitor, bortezomib, further shifted Fbw7 to  
202 chromatin (Figure 3 – figure supplement 1), supporting the hypothesis that substrate binding  
203 underlies Fbw7 chromatin association.

204 Myc and Jun are TF substrates with important roles in Fbw7-associated cancers (R. J.  
205 Davis et al., 2014). Myc deregulation in cancers results from either Fbw7 or Myc-CPD mutations  
206 (R. J. Davis et al., 2014; Welcker et al., 2004; Yada et al., 2004; Yumimoto & Nakayama, 2020).  
207 Myc stabilization is an important driver of Fbw7-associated tumorigenesis (R. J. Davis et al.,  
208 2014; O. M. Khan et al., 2018; King et al., 2013; Reavie et al., 2013; Yumimoto & Nakayama,  
209 2020). CPD phosphorylation and Myc ubiquitylation also modulate Myc transcriptional activity  
210 (Endres et al., 2021; Gupta et al., 1993; Hemann et al., 2005; Jaenicke et al., 2016; Thomas &  
211 Tansey, 2011). Fbw7 loss stabilizes Myc in Hct116 cells but Myc steady state abundance is less  
212 impacted, due to Myc autoregulation (Grim et al., 2008). Fbw7 also targets Jun for degradation  
213 after multisite phosphorylation (Csizmok et al., 2018; Nateri et al., 2004; Wei et al., 2005) and

214 several factors regulate Jun degradation by Fbw7 in Hct116 cells, including Rack1 (Zhang et al.,  
215 2012), BLM (Priyadarshini et al., 2018) and Usp28 (Diefenbacher et al., 2014).

216 We profiled genome-wide Jun and Myc occupancy (Figure 3 – figure supplement 2A) to  
217 determine the extent to which they are deregulated by Fbw7 mutations. As expected, Jun-binding  
218 and Myc-binding site motifs were highly enriched in the respective datasets (Figure 3 – figure  
219 supplement 2B). Differential binding analyses of the Jun and Myc peaks demonstrated that 5.3%  
220 and 3.8% of the Jun sites and 2.2% and 3.3% of the Myc sites exhibited differential occupancy in  
221 the Fbw7<sup>-/-</sup> and Fbw7<sup>R/+</sup> cells, respectively (Figure 3B, Figure 2 – source data 2). Thus, Fbw7  
222 mutations lead to changes in Myc and Jun occupancy at specific loci, rather than a global  
223 increase in their chromatin occupancy.

224 Like H3K27ac, most non-differential Myc binding sites were promoter-proximal,  
225 whereas almost all differential sites with increased Myc occupancy in *FBXW7* mutant cells fell  
226 within introns and intergenic regions (p value < 0.001, Fisher test) (Figure 3C, Figure 3 – figure  
227 supplement 3). Compared with Myc, a smaller proportion of the total Jun sites in WT-Hct116  
228 cells were promoter-proximal, but again the sites with differential occupancy in Fbw7 mutant  
229 cells were heavily biased to intron and intragenic regions (p value < 0.0001, Fisher test) (Figure  
230 3C). The differential sites in introns and intergenic loci were also enriched for H3K27ac and  
231 H3K4me1, which is consistent with the idea that these sites function as distal regulatory  
232 elements, such as enhancers (Figure 3D).

233 To study the functional significance of Fbw7-dependent changes in Jun and Myc binding,  
234 we examined the expression of genes that could be linked to differential Jun or Myc sites (within  
235 the gene body or 10 kb upstream of TSS) (Figure 3E). Approximately 40% of genes with  
236 increased promoter-proximal Jun occupancy and 46% of genes with decreased promoter-

237 proximal Jun occupancy in Fbw7<sup>-/-</sup> cells exhibited corresponding increases or decreases in RNA  
238 expression (Figure 3F). Other genes linked to differential sites were either not captured by RNA-  
239 Seq or had expression changes that were statistically non-significant. Similar associations were  
240 seen with Myc differential sites, although fewer could be linked with transcripts than for Jun  
241 (Figure 3 – figure supplement 4). Overall, the differential sites that could be linked with  
242 associated genes showed strong concordance between the change in Jun or Myc occupancy and  
243 RNA expression.

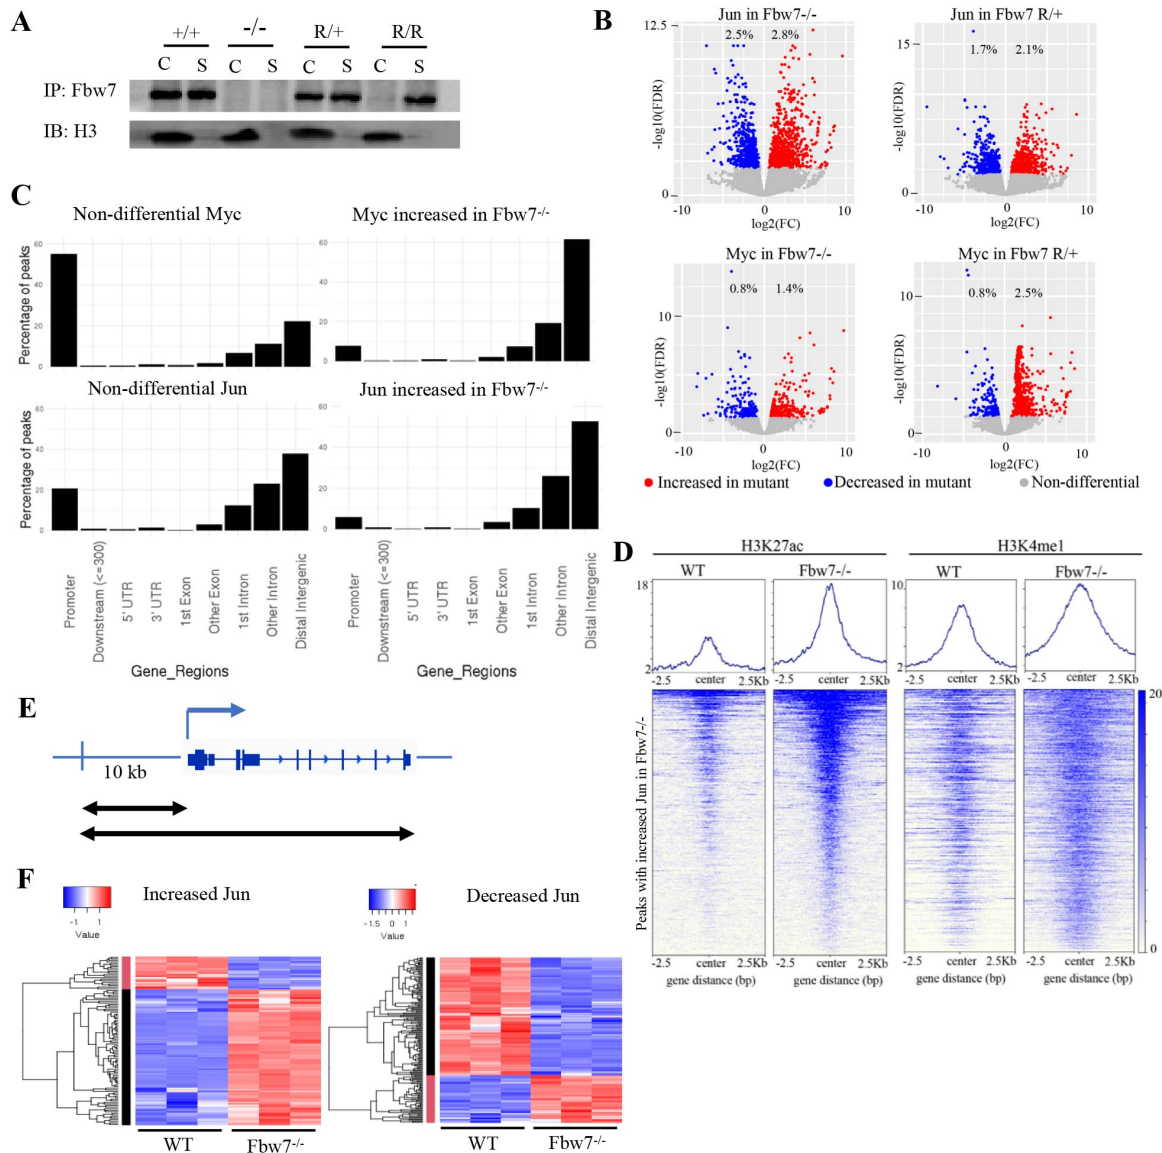

244

245 **Figure 3. Fbw7 regulates the occupancy of Jun and Myc on DNA, preferentially at distal regulatory regions.**

246 (A) Fbw7 abundance in chromatin (C) and soluble (S) fractions from Hct116 WT, Fbw7<sup>R/+</sup> and Fbw7<sup>R/R</sup> cells.

247 Histone H3 was detected in chromatin fractions. (B) Increased (red) and decreased (blue) Jun and Myc sites in

248 Hct116 Fbw7<sup>-/-</sup> and Fbw7<sup>R/+</sup> cells compared to WT. (C) Non-differential and differential Jun and Myc peaks located

249 within gene features. (D) H3K27ac and H3K4me1 CUT&RUN signal from Hct116 WT and Fbw7<sup>-/-</sup> cells mapped on

250 genomic sites that have increased Jun occupancy in Fbw7<sup>-/-</sup> cells. (E) Schema depicting the filtering criteria applied

251 to the annotated differential sites to select gene proximal sites. (F) Transcription of genes that have increased or

252 decreased Jun bound at a gene proximal site. (Each row is a gene and three replicates each from Hct116 WT and

253 Fbw7<sup>-/-</sup> cells are shown.) See Figure 3 – figure supplement 1- 4 and Figure 3 – source data 1-2.

254 **Fbw7<sup>-/-</sup> and Fbw7<sup>R/+</sup> mutation-specific consequences on Jun and Myc occupancy.**

255 We next examined how Jun occupancy is differentially affected by Fbw7<sup>R/+</sup> and Fbw7<sup>-/-</sup>  
256 mutations. Many of the differential Jun sites were common to both mutant cell lines: 48% of  
257 differential Jun sites in Fbw7<sup>R/+</sup> (252/530; p value <0.0001, Fisher test) and 35% of differential  
258 Jun sites in Fbw7<sup>-/-</sup> (252/715) (Figure 4A). Representative Jun peaks that are increased in Fbw7<sup>-/-</sup>  
259 and/or Fbw7<sup>R/+</sup> are shown in Figure 4B: a) Jun occupancy at *KCNQ5* intronic sites was increased  
260 only in Fbw7<sup>-/-</sup> cells; b) in *ITGA2*, Jun occupancy was increased in both Fbw7<sup>-/-</sup> and Fbw7<sup>R/+</sup>, but  
261 to an intermediate level in Fbw7<sup>R/+</sup>; and c) in *MAML2*, Jun occupancy was increased in Fbw7<sup>R/+</sup>  
262 more highly than in Fbw7<sup>-/-</sup>.

263 We found many sites like *ITGA2*, that exhibited an intermediate impact of Fbw7<sup>R/+</sup> on  
264 Jun occupancy, compared with Fbw7<sup>-/-</sup>, as depicted by the heatmap of Jun signal from WT,  
265 Fbw7<sup>R/+</sup>, and Fbw7<sup>-/-</sup> cells mapped on all the sites with increased Jun occupancy in Fbw7<sup>-/-</sup> cells  
266 (Figure 4C). H3K27ac followed the same trend exhibited by Jun (Figure 4B, 4D). RNA-Seq data  
267 showed that genes in cluster 3 and 4 were deregulated in both Fbw7<sup>-/-</sup> and Fbw7<sup>R/+</sup>, but to an  
268 intermediate level in Fbw7<sup>R/+</sup> (Figure 1B, 1C). Because the Fbw7<sup>-/-</sup> and Fbw7<sup>R/+</sup> cells were  
269 derived independently, these shared sites and the gradients in Jun occupancy, H3K27ac, and  
270 RNA expression (Fbw7<sup>-/-</sup> > Fbw7<sup>R/+</sup>) all support the conclusion that these differences are directly  
271 attributable to Fbw7 status.

272 We also identified Jun differential sites that were uniquely impacted by each mutation  
273 type (Figure 4A), which includes a subset of sites that were more strongly impacted by Fbw7<sup>R/+</sup>.  
274 RNA-Seq data also showed that genes in cluster 5 and 6 were deregulated most strongly in  
275 Fbw7<sup>R/+</sup>. In summary, we identified differential Jun sites that are uniquely affected by each Fbw7  
276 mutation type and others that were shared between the two mutant cell lines.



277 **Fbw7 coordinately regulates Jun and Myc at co-occupied loci**

278 Myc and Jun are oncogenic TFs with activities in shared pathways, and we next  
279 examined how they might be coregulated at shared sites. Approximately 20% of the Myc and Jun  
280 binding sites overlapped in Hct116 WT cells (Figure 4 – figure supplement 1A,  $p < 0.0001$   
281 Fisher Test) and Jun and Myc exhibited striking coordinate regulation by Fbw7 at these co-  
282 occupied differential loci. We identified 78 sites in which both Jun and Myc occupancy were  
283 increased in Fbw7<sup>-/-</sup> cells and 53 sites where both Jun and Myc were decreased in Fbw7<sup>-/-</sup> cells  
284 (Figure 4E, 4F). In contrast, no sites with discordant changes in Jun and Myc occupancy (e.g.,  
285 increased Jun but decreased Myc) were found (Figure 4G, 4H). We found similar concordance in  
286 co-regulated Jun and Myc sites in Fbw7<sup>R/+</sup> cells (Figure 4 – figure supplement 1B,1C).

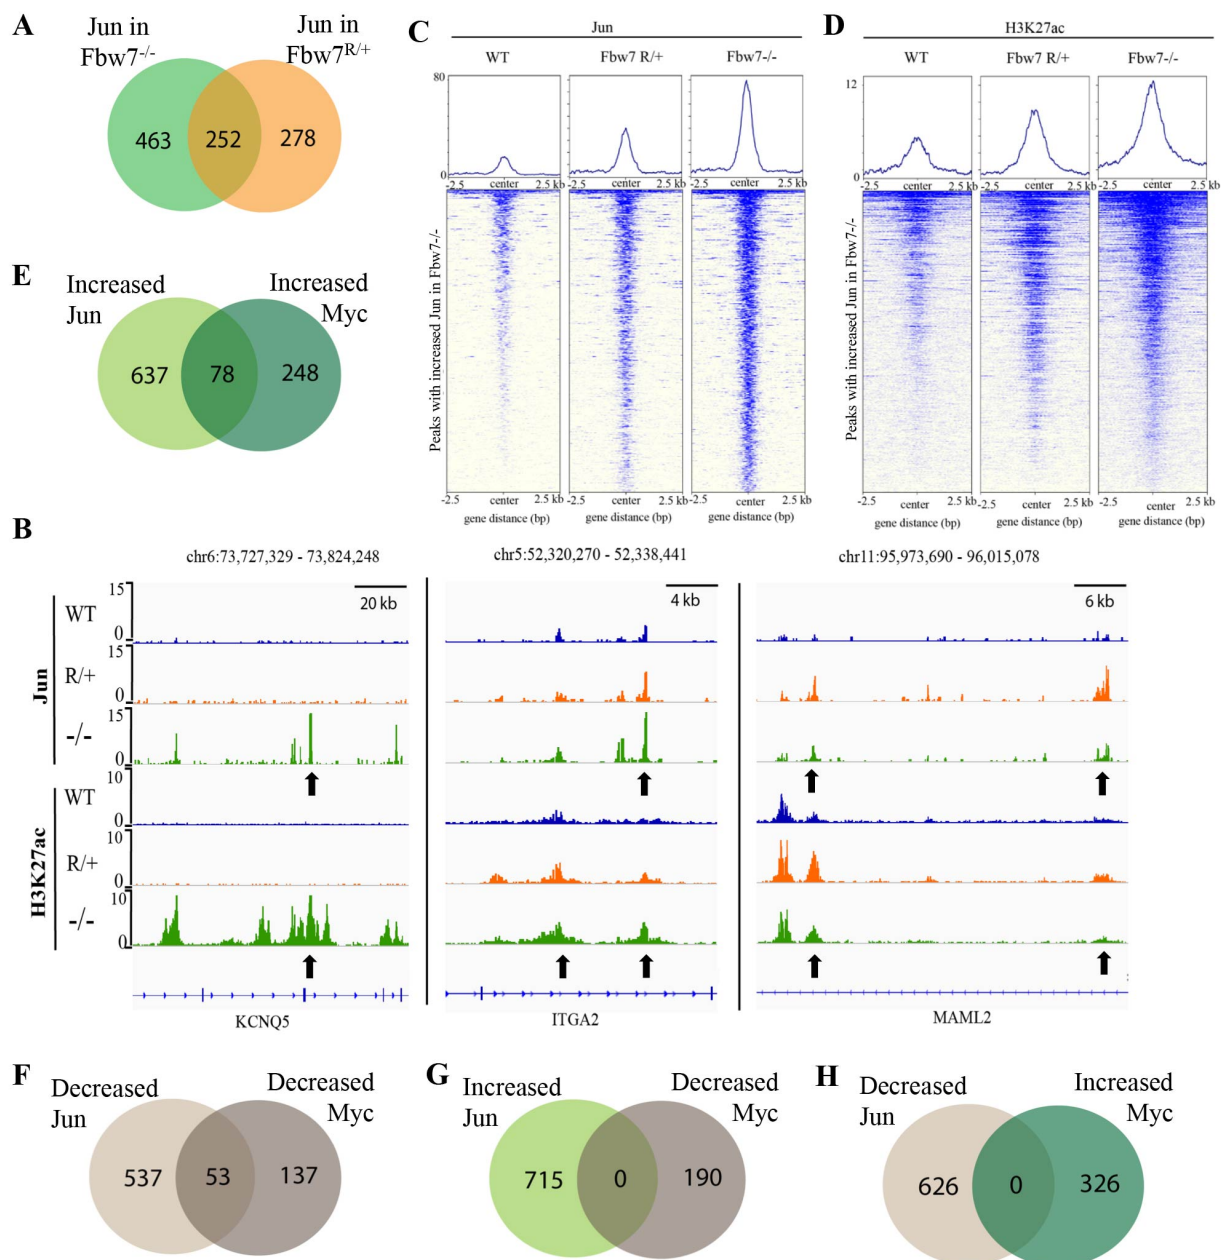

287

288 **Figure 4. Fbw7 exhibits mutation-type specific regulation and coordinate regulation of multiple TFs.** (A) The  
 289 overlap between peaks with increased Jun in Fbw7<sup>-/-</sup> and Fbw7<sup>R/+</sup> cells. (B) Genome browser view of Jun and  
 290 H3K27ac occupancy in Hct116 WT, Fbw7<sup>-/-</sup> and Fbw7<sup>R/+</sup> cells at representative loci. Black arrows point to peaks  
 291 with increased signal uniquely in Fbw7<sup>-/-</sup> (*KCNQ5*), in both Fbw7<sup>-/-</sup> and Fbw7<sup>R/+</sup> (intermediate level in Fbw7<sup>R/+</sup>)  
 292 (*ITGA2*) and increased in Fbw7<sup>R/+</sup> than in Fbw7<sup>-/-</sup> (*MAML2*). (C, D) Heatmap of Jun and H3K27ac signal from each  
 293 cell type mapped on sites with increased Jun in Fbw7<sup>-/-</sup> cells. (E-H) E-The overlap between peaks with increased Jun  
 294 and Myc, F- decreased Jun and Myc, G- increased Jun and decreased Myc, H-decreased Jun and increased Myc in  
 295 Fbw7<sup>-/-</sup> cells. See Figure 4 – figure supplement 1.

296

297 **Jun and Myc co-regulation by Fbw7 controls MHC Class II gene expression**

298 “MHC Class II” was the most enriched GO term in genes that exhibited altered  
299 expression in *Fbw7<sup>-/-</sup>* cells (Figure 1C). Unlike the MHC class I genes, which are expressed in all  
300 cells, MHC Class II genes are normally expressed only in specific immune cells, and their  
301 expression is controlled by the Class II Major Histocompatibility Transactivator (*CIITA*) gene  
302 (Masternak et al., 2000; Ting & Trowsdale, 2002). We found that Myc and Jun occupancy were  
303 increased within *CIITA* upstream regulatory regions in *Fbw7<sup>-/-</sup>* cells (Figure 5A).

304 The *CIITA* gene contains four promoters (hereafter referred to as PI – PIV) that specify  
305 four transcripts with distinct first exons (Muhlethaler-Mottet et al., 1997). While *CIITA* isoform  
306 III is constitutively expressed in antigen presenting cells (APCs), isoform IV is inducible by  
307 cytokines in non-hematopoietic cells (van der Stoep et al., 2007). The PIII Upstream Regulatory  
308 Region (PURR) is located 6kb upstream of PIII and consists of regulatory sites for both  
309 constitutive and IFN $\gamma$ -induced *CIITA* expression (Deffrennes et al., 2001; van der Stoep et al.,  
310 2007), as well as an AP-1 site (Martins et al., 2007). We found both Myc and Jun bound to  
311 regulatory elements (PURR and an element 14kb upstream of *CIITA*-PIII) and that their  
312 occupancy was increased in *Fbw7<sup>-/-</sup>* cells (Figure 5A). Jun and Myc occupancy were also  
313 increased at these sites in *Fbw7<sup>R/+</sup>* cells, but to a lesser extent. H3K27ac and H3K4me1 were  
314 increased at these sites in *Fbw7<sup>-/-</sup>* cells, which is indicative of active transcription, and RNA-Seq  
315 revealed increased *CIITA* mRNA expression in *Fbw7<sup>-/-</sup>* cells (Figure 5B). Isoform-specific  
316 primers demonstrated that the pIII isoform is elevated in *Fbw7<sup>-/-</sup>* cells, but that the pIV isoform is  
317 not expressed (Figure 5C). Raji cells are shown as a control cell that expresses both *CIITA*  
318 isoforms. Importantly, the amount of upregulated *CIITA* expression in *Fbw7<sup>-/-</sup>* cells is  
319 functionally significant and caused increased expression of MHC Class II genes that are targets

320 of CIITA (HLA-DPA, HLA-DPB, HLA-DRB and HLA-DRA) (Figure 5B). In contrast, MHC  
321 Class I genes were not differentially expressed in *FBXW7* mutant cells (Figure 5 – figure  
322 supplement 1).

323 We also analyzed CIITA expression in primary colorectal cancers in TCGA datasets,  
324 which revealed increased CIITA expression in *FBXW7* mutant cancers compared with *FBXW7*  
325 WT tumors (Figure 5D). Because these primary tumors contain immune infiltrates, the increased  
326 CIITA expression could reflect CIITA expression in either tumor cells or immune cells. We thus  
327 analyzed colorectal cancer cell lines in the Cancer Cell Line Encyclopedia, which also exhibited  
328 elevated CIITA expression in *FBXW7* mutant cell lines (Figure 5E) (Ghandi et al., 2019). These  
329 data support the idea that *Fbw7* regulates CIITA expression in colorectal cancer, likely due to  
330 coregulation of Myc and Jun at the PIII upstream regulatory site.

331

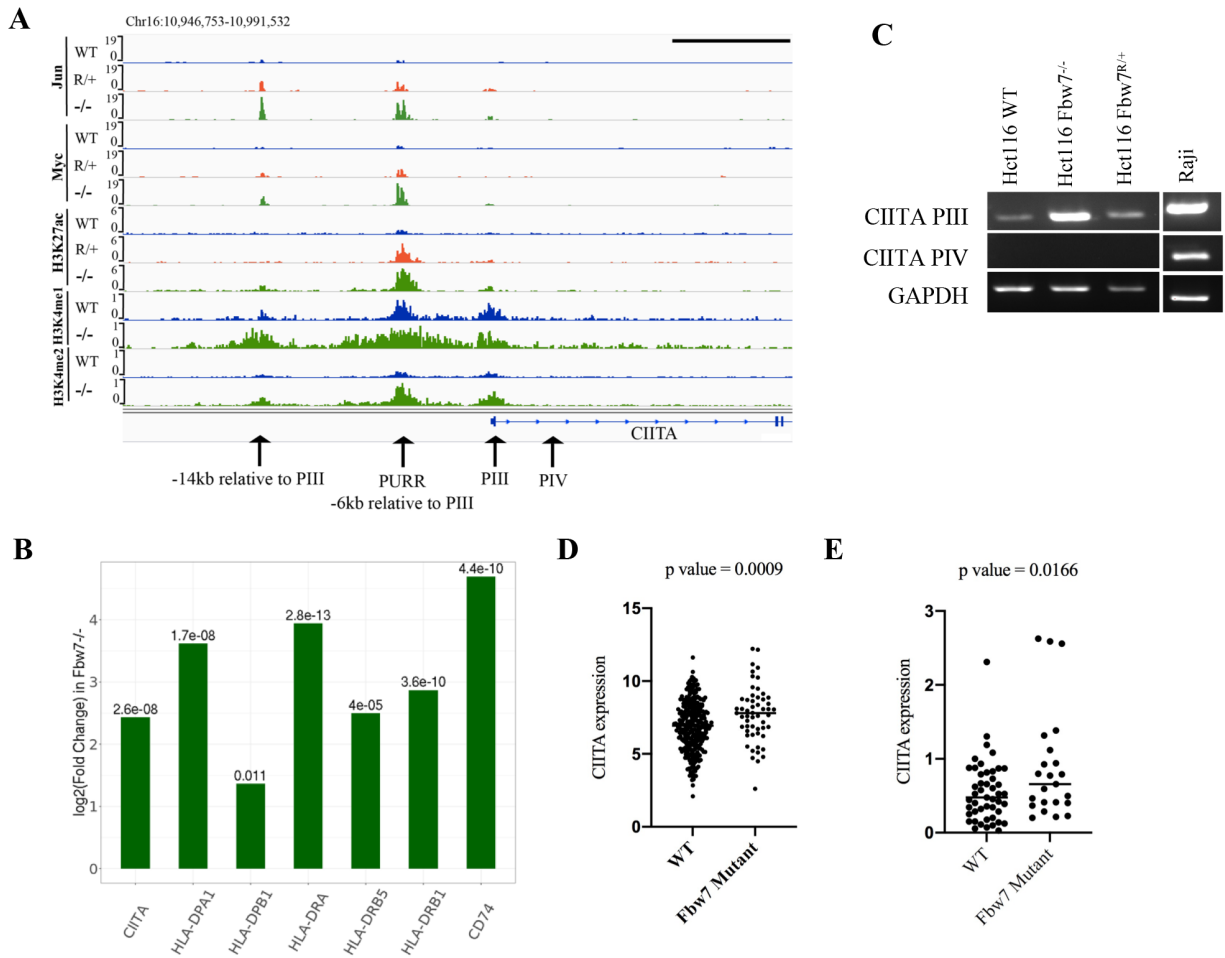

332

333 **Figure 5. Fbw7 regulates the expression of MHC Class II genes.** (A) Genome browser view of TFs and histone  
 334 modification marks enriched at the promoter and regulatory sites upstream of *CIITA* gene. Arrows point to (from  
 335 right to left): PIV (promoter of isoform IV); PIII (promoter of isoform III); PURR (PIII Upstream Regulatory  
 336 Regions) - a known regulatory site 6 kb upstream of PIII; and a known regulatory site 14 kb upstream to PIII. Black  
 337 scale bar = 10 kb (B) Expression fold change of *CIITA* and MHC Class II genes in Hct116 Fbw7<sup>-/-</sup> with respect to  
 338 WT cells. FDR values are indicated on top of each bar. n = 3 (C) *CIITA* isoform III and IV amplified using isoform  
 339 specific primers in Hct116 and Raji cells. (D) *CIITA* expression in primary cancer samples from TCGA  
 340 COADREAD datasets that have WT Fbw7 (n=297) and mutated Fbw7 (n=55). (E) *CIITA* expression in colon and  
 341 rectal cancer cell lines with WT Fbw7 (n=47) and mutated Fbw7 (n=23). Data collected from DepMap portal. See  
 342 Figure 5 – figure supplement 1, Figure 5 – source data 1-3

343

344

345 **Acute Fbw7 loss in neural stem cells recapitulate findings from Hct116 cells.**

346 Because the Fbw7 mutations in the Hct116 cell panel were stably engineered into a  
347 transformed cell line, we examined the generalizability of these results by determining how acute  
348 Fbw7 deletion in a non-transformed cell line impacts RNA expression and Jun occupancy. We  
349 studied neural stem cells (NSCs) as a cell type with characterized Fbw7-mediated Jun regulation  
350 (Hoeck et al., 2010) and used a high efficiency CRISPR/nucleofection protocol to inactivate  
351 Fbw7 in U5 NSCs without the need for selection (Figure 6 – figure supplement 1A)  
352 (Hoellerbauer, Kufeld, & Paddison, 2020; Hoellerbauer, Kufeld, Arora, et al., 2020). Analogous  
353 to the Hct116 cell panel, ~9% of protein-coding genes were differentially expressed in Fbw7<sup>-/-</sup>  
354 cells compared with WT-U5 NSCs (Figure 6A). GO term analysis on the differentially expressed  
355 genes again revealed several enriched categories, some of which were shared with Hct116 cells  
356 (Figure 6B). Notably, “MHC class II” was one of the highly enriched GO terms in Fbw7<sup>-/-</sup> U5  
357 NSCs.

358 We mapped Jun genomic occupancy in WT and Fbw7<sup>-/-</sup> NSCs and found results that  
359 mirrored those in the Hct116 cell panel (Figure 6 – figure supplement 1B): (1) only a subset of  
360 the Jun binding sites displayed differential occupancy after Fbw7 inactivation (8.3% increased  
361 and 4.1% decreased) sites, and (2) most of the differentially regulated sites occurred in introns  
362 and intergenic regions (p value < 0.0001, Fisher test) (Figure 6C, 6D, Figure 6 – figure  
363 supplement 2). Thus, while the specific loci impacted by Fbw7 loss in the Hct116 cells NSCs  
364 differed, the scope of Fbw7’s impact on Jun was quite similar in both contexts. One striking  
365 similarity between the two systems was the regulation of CIITA and MHC class II expression  
366 (Figure 6E). Jun and Myc were both bound at regulatory regions upstream of CIITA in NSCs  
367 while Myc was differentially increased in Fbw7<sup>-/-</sup> NSCs (Figure 6F). Unlike Hct116 cells, NSC

368 WT cells express a basal level of CIITA, which may reflect constitutive (Fbw7-independent) Jun  
369 occupancy upstream of CIITA (Figure 6 – figure supplement 3).

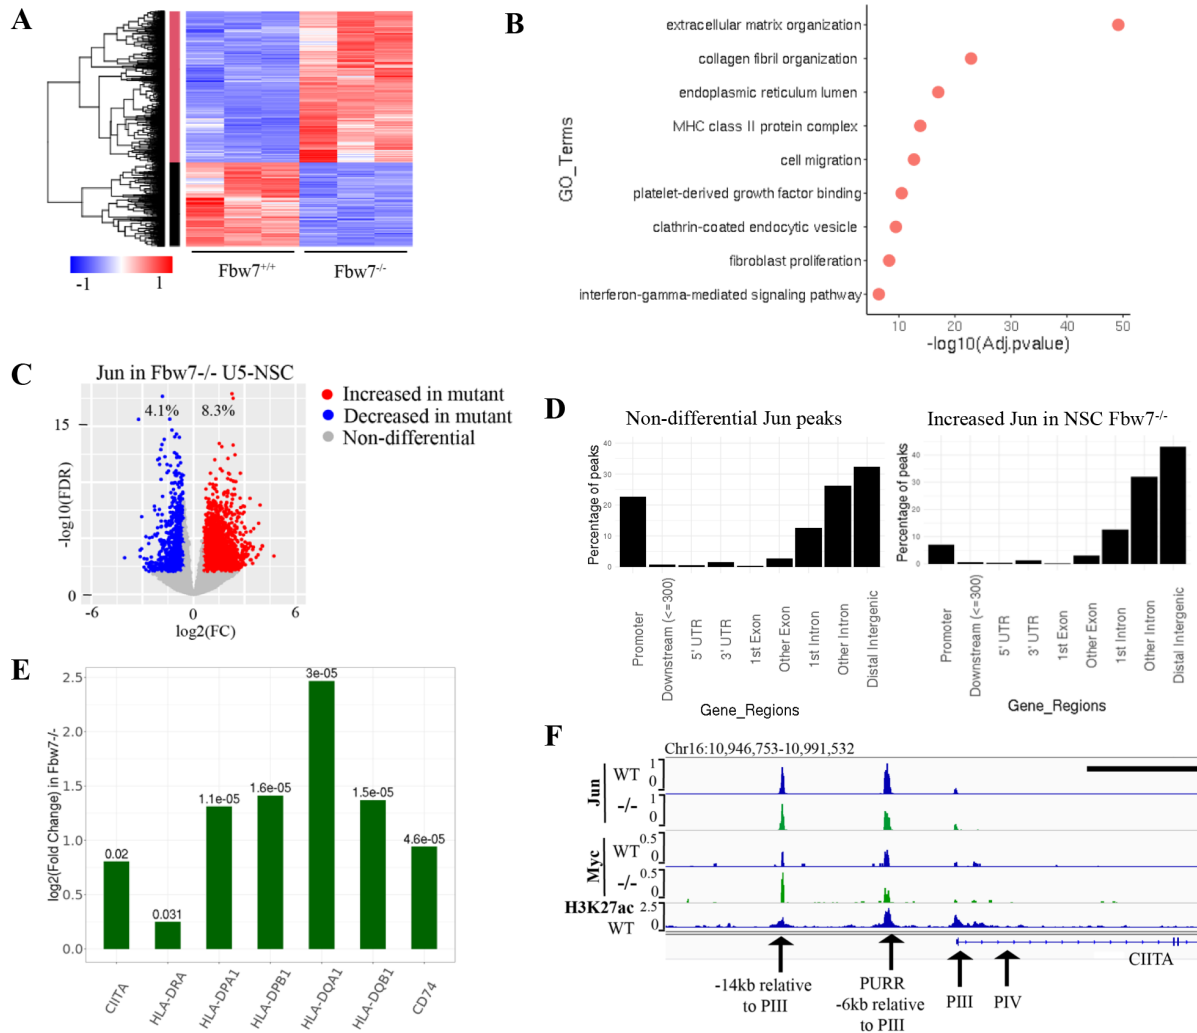

370  
 371 **Figure 6. Transcriptional consequences of loss of Fbw7 in neural stem cells.** (A) Clustering analysis separates  
 372 differentially expressed protein-coding genes in NSCs into two groups. Heatmap shows the intensity of expression  
 373 of each gene (y axis) for three replicates per cell type (x axis). (B) Gene Ontology terms enriched in differentially  
 374 expressed genes in Fbw7<sup>-/-</sup> NSCs. (C) Sites with increased (red) and decreased (blue) Jun in Fbw7<sup>-/-</sup> NSCs compared  
 375 to WT. (D) Non-differential and differential Jun peaks located within each gene feature. (E) Fold change of CIITA  
 376 and MHC Class II genes in Fbw7<sup>-/-</sup> NSCs compared to WT. FDR values are given at the top of each bar. n = 3 (F)  
 377 Genome browser view of Myc, Jun, and H3K27ac occupancy on CIITA regulatory regions in WT and Fbw7<sup>-/-</sup>  
 378 NSCs. Black scale bar = 8 kb. See Figure 6 – figure supplement 1-3, Figure 6 – source data 1-5

379



380 **Discussion**

381 Our primary goal was to understand the global transcriptional consequences of oncogenic  
382 Fbw7 mutations. Fbw7 loss affected ~10% of all expressed genes, which could reflect Fbw7  
383 substrates that are either sequence-specific TFs or global transcriptional regulators, such as the  
384 Mediator complex (M. A. Davis et al., 2013). However, only small subsets of the mapped  
385 H3K27ac and Jun/Myc binding sites were affected by the Fbw7 status. What might account for  
386 this specificity? One factor appears to be where the Fbw7-dependent loci are located, since most  
387 differential sites fell within distal regulatory elements. By targeting an enhancer rather than  
388 individual promoters, Fbw7 might cooperatively regulate multiple genes via a single regulatory  
389 region. TF phosphorylation may also be restricted to just the differential sites, thereby limiting  
390 the loci that can be targeted by Fbw7. If so, we might expect to find Fbw7 bound to these sites,  
391 as supported by our data implicating TFs in Fbw7 recruitment to chromatin (Figure 3 – figure  
392 supplement 1). However, we have not yet been able to map Fbw7 to specific chromatin sites.  
393 Despite the many differences between the Hct116 cell panel and NSCs (e.g., cell type, acute  
394 versus chronic Fbw7 loss, transformed versus non-transformed cells), Fbw7 loss had remarkably  
395 similar consequences, suggesting that these features reflect fundamental properties of Fbw7  
396 function.

397 Although only a minority of Jun and Myc binding sites were differentially regulated by  
398 Fbw7, there was substantial overlap and remarkable co-regulation: in every case where they  
399 overlapped, both Jun and Myc occupancy were coordinately either increased or decreased by  
400 Fbw7 loss. We speculate that at coregulated sites such as CIITA, Fbw7 coordinately regulates  
401 transcription through the concerted targeting of both Jun and Myc. The expected outcome of  
402 Fbw7 loss is substrate accumulation, and most differential sites had increased occupancy in

403 Fbw7 mutant cells. However, we also found differential sites with decreased Jun or Myc  
404 occupancy and correspondingly less mRNA expression in Fbw7 mutant cells. The mechanisms  
405 through which Fbw7 loss decreases TF occupancy remain to be elucidated. While Myc  
406 ubiquitylation regulates its role in transcriptional elongation (Jaenicke et al., 2016), our data do  
407 not presently provide insights into this potential aspect of Myc ubiquitylation by Fbw7.

408 Fbw7<sup>R/+</sup> mutations may specifically stabilize those substrates that require a fully  
409 functional Fbw7 dimer (Welcker et al., 2013). One example may be Myc, which is partially  
410 stabilized by Fbw7<sup>R/+</sup> in T-cells (King et al., 2013). Because excess Myc protein induces  
411 apoptosis, intermediate Myc stabilization caused by Fbw7<sup>R/+</sup> may be an example of the “just  
412 enough” model (H. Davis & Tomlinson, 2012). Indeed, our finding that many of the deregulated  
413 genes and loci shared between the Fbw7<sup>-/-</sup> and Fbw7<sup>R/+</sup> mutant cell lines exhibited intermediate  
414 deregulation in the Fbw7<sup>R/+</sup> cells supports the notion of “just enough” Fbw7<sup>R/+</sup> transcriptional  
415 outcomes. However, we also found differential transcripts and loci that were more severely  
416 impacted by Fbw7<sup>R/+</sup> than by Fbw7<sup>-/-</sup>, suggesting that heterozygous Fbw7 missense mutations  
417 also have unique functional outcomes (Figure 4B).

418 Our inability to link most differential sites to specific genes limited the identification of  
419 biologic pathways associated with Fbw7 loss. One important exception, however, is MHC Class  
420 II gene expression. Constitutive CIITA expression is normally confined to antigen presenting  
421 cells and it was striking to find CIITA and MHC Class II genes expressed in Fbw7 mutated  
422 colon cancer cells. Abnormal CIITA and MHC Class II expression has been observed in tumors,  
423 including colorectal cancers (Axelrod et al., 2019; Sconocchia et al., 2014). For example,  
424 aberrant CIITA expression in melanomas results from the activation of both IFN $\gamma$ -inducible and  
425 constitutive CIITA promoters (van der Stoep et al., 2007). Moreover, deletion of the AP-1 site

426 that we found differentially occupied by Jun in Fbw7 mutant cells was found to compromise  
427 CIITA expression in melanoma cells (van der Stoep et al., 2007). In sum, these data support a  
428 model in which Fbw7 loss indirectly augments CIITA expression through increased Jun and Myc  
429 occupancy at these regulatory regions.

430         What are the implications of Fbw7-dependent CIITA expression in colorectal cancers?  
431 Tumor cell specific MHC Class II expression is generally associated with favorable prognosis,  
432 which may reflect increased tumor immunogenicity conferred by MHC Class II expression.  
433 Intriguingly, *FBXW7* mutations and distant metastasis almost never co-occur in colorectal  
434 cancers (Muzny et al., 2012). Fbw7 loss may thus confer better prognosis, perhaps due to Fbw7-  
435 dependent MHC class II upregulation. Accordingly, we found increased CIITA expression in  
436 TCGA colorectal tumors and CCLE colorectal cancer cell lines with *FBXW7* mutations.  
437 Previously, we used machine learning to develop gene expression signatures that predicted  
438 *FBXW7* mutations in TCGA tumors. While we focused on a metabolic gene signature in the  
439 study, we also found that a signature comprised of MHC Class II and other genes associated with  
440 immune response was also highly predictive of *FBXW7* mutations in colorectal cancers (R. J.  
441 Davis et al., 2018 Supplemental Dataset S02). While these TCGA analyses are correlative, in  
442 light of our finding that Fbw7 loss induces CIITA expression in Hct116 cells and NSCs, we  
443 speculate that Fbw7 mutations in colorectal cancers lead to increased CIITA expression,  
444 increased immunogenicity, and better prognosis.

445         Others have also found associations between Fbw7 status and immune responses in  
446 cancer. A recent study found that an Fbw7<sup>R/+</sup> mutation conferred resistance to PD-1 blockade  
447 through impaired dsRNA sensing and IFN $\gamma$  signaling in a metastatic melanoma and a murine  
448 melanoma model (Gstalter et al., 2020). Fbw7 loss also correlated with decreased IFN $\gamma$

449 signaling in TCGA cancers. In this case, Fbw7<sup>R/+</sup> decreased MHC Class I but not MHC Class II  
450 expression and caused a more aggressive phenotype associated with decreased immunogenicity.  
451 These discrepancies with our study may relate to the different model systems and tumor types.  
452 In mice, Fbw7 also regulates the tumor microenvironment through a non-tumor-cell-autonomous  
453 manner involving expression of the CCL2 chemokine (Yumimoto et al., 2015). Further studies  
454 are needed to fully appreciate the pathologic and therapeutic implications of Fbw7-related tumor  
455 immunogenicity and immune responses to cancer.

456 Overall, these data establish a framework for understanding how mutations in Fbw7 can  
457 exert context-specific deregulatory effects and how Fbw7 substrates can act synergistically to  
458 drive tumor progression.

459 **Materials and Methods**

460 **RNA-Seq: RNA isolation, library preparation, sequencing and data analysis**

461 RNA was isolated using the Qiagen RNeasy Mini Kit (Cat# 74104) following the manufacturer's  
462 instructions. Three replicates per cell type were included and for each replicate cells were  
463 harvested from separate cultured plates. RNA quality and integrity were determined (A260/280  
464 1.8 – 2.1, A260/230 > 1.7, RIN  $\geq$  9). Libraries were prepared by the Fred Hutch Genomics  
465 Center using the TruSeq RNA Samples Prep Kit v2 (Illumina Inc., San Diego CA, USA).  
466 Sequencing was performed on a Illumina HiSeq 2500 with 50 bp paired-end reads (PE50). RNA-  
467 Seq for U5-NSCs was an exception. Knockouts were generated separately on two different days  
468 and cells from separate nucleofection reactions were used as the three replicates, hence  
469 biological replicates. Libraries were prepared using TruSeq Stranded mRNA and sequencing was  
470 performed using an Illumina NovaSeq 6000 employing a paired-end 50 base read length (PE50).  
471  
472 Fastq files were filtered to exclude reads that didn't pass Illumina's base call quality threshold.  
473 STAR v2.7.1 (Dobin et al., 2013) with 2-pass mapping was used to align paired-end reads to  
474 human genome build hg19 and GENCODE gene annotation v31lift37  
475 (<https://www.gencodegenes.org/human/>). FastQC 0.11.8  
476 (<https://www.bioinformatics.babraham.ac.uk/projects/fastqc/>) and RSeQC 3.0.0 (Wang et al.,  
477 2012) were used for QC including insert fragment size, read quality, read duplication rates, gene  
478 body coverage and read distribution in different genomic regions. FeatureCounts (Liao et al.,  
479 2014) in Subread 1.6.5 was used to quantify gene-level expression. For stranded libraries, only  
480 coding strand derived reads were counted. Bioconductor package edgeR 3.26.8 (Robinson et al.,  
481 2009) was used to detect differential gene expression between conditions. Genes with low

482 expression were excluded by requiring at least one count per million in at least N samples (N is  
483 equal to one less than the number of samples in the smallest group). The filtered expression  
484 matrix was normalized by TMM method (Robinson & Oshlack, 2010) and subject to significance  
485 testing using generalized linear model and quasi-likelihood method. Genes were deemed  
486 differentially expressed if absolute fold changes were above 1.5 and FDRs were less than 0.05.

487

#### 488 **Cleavage Under Target and Release Using Nuclease (CUT&RUN)**

489 Manual or automated CUT&RUN were performed as previously described (Janssens et al., 2018;  
490 Skene et al., 2018; Skene & Henikoff, 2017). Briefly, cells were harvested using Accutase,  
491 counted and washed twice with Wash Buffer (20mM HEPES pH 7.5, 150 mM NaCl, 0.5mM  
492 Spermidine and one Roche Complete EDTA free protein inhibitor tablet per 50 mL). Cells were  
493 bound to Concanavalin A-coated magnetic beads (20uL per one million cells). Then cells were  
494 permeabilized with Dig Wash buffer (Wash Buffer with 0.05% Digitonin) while being incubated  
495 with primary antibody overnight at 4 °C. Cell-bead mixture was washed twice with Dig-Wash  
496 buffer and incubated with Protein A-MNase (pA-MN) for 1 hour at 4 °C. After washing the mix  
497 with Dig Wash buffer twice, cells were placed on an ice-cold block and incubated with 2 mM  
498 CaCl<sub>2</sub> in Dig Wash buffer to activate pA-MN digestion. After the specific digestion period the  
499 reaction was inhibited with 2X Stop Buffer (340 mM NaCl, 20mM EDTA, 4mM EGTA, 0.05%  
500 Digitonin, 0.05% mg/ml glycogen, 5 ug/mL RNase, 2pg/mL heterologous spike-in DNA). The  
501 samples were incubated at 37 °C for 30 min to release the digested DNA fragments into the  
502 supernatant. The supernatant was collected and libraries were prepared as previously explained  
503 (Janssens et al., 2018). Paired-end 25 base read length (PE25) sequencing was performed using  
504 an Illumina HiSeq 2500 platform at Fred Hutch Genomics Shared Resources.

505 Deviations from the above described protocol:

506 1. Automated CUT&RUN: Manual preparation included harvesting cells, counting,  
507 washing, permeabilizing and antibody addition. After cells were incubated with the  
508 antibody at 4 °C overnight, next day the samples were submitted for automated  
509 CUT&RUN which was performed by the Genomics and Bioinformatics Center at Fred  
510 Hutch on a BioMek platform.

511 2. Used nuclei instead of cells: H3K4me1 and H3K4me2 were mapped using the  
512 CUT&RUN protocol as previously described using isolated nuclei (Skene & Henikoff,  
513 2017).

514 A summary of all CUT&RUN samples with conditions and method used can be found at  
515 Additional source data 1.

516

517 **CUT&RUN data analysis**

518 Basic analysis: Sequencing reads were aligned to hg19 using Bowtie2: bowtie2 --end-to-end --  
519 very-sensitive --no-overlap --no-dovetail --no-unal --no-mixed --no-discordant -q -I 10 -X 700 -x  
520 path/to/Bowtie2/indices -1 read1.fastq.gz -2 read2.fastq.gz

521 CPM normalized bigwig files were generated using bedtools genomecov.

522 Peaks were called using MACS2. Peak calling was performed for each target with and without  
523 the IgG control.

524 Narrow peaks with IgG control: macs2 callpeak --name TARGET --treatment

525 path/to/TARGET/hg19.bam --control path/to/IgG/hg19.bam --format BAMPE --gsize hs --keep-

526 dup all -q 0.05

527 Narrow peaks without IgG control: macs2 callpeak --name TARGET --treatment  
528 path/to/TARGET/hg19.bam --format BAMPE --gsize hs --keep-dup all -q 0.05  
529 IgG-controlled peaks that overlap with no-control peaks were retained for further analyses. For  
530 each TF/histone mark mapped in each genotype, peaks from three replicates were considered to  
531 make a final peak-set to use for downstream analysis.

532

533 Differential binding analysis: Merged peak set for each target was used for the analysis.  
534 FeatureCounts (Liao et al., 2014) in Subread 1.6.5 was used to count reads mapped to merged  
535 peaks in each sample. Bioconductor package edgeR 3.26.8 (Robinson et al., 2009) was used to  
536 detect differential peaks between conditions. Peaks with low read numbers were excluded using  
537 edgeR function filterByExpr with min.count = 10 and min.total.count = 15. The filtered count  
538 matrix was normalized by TMM method (Robinson & Oshlack, 2010) and subjected to  
539 significance testing using generalized linear model and quasi-likelihood method. Peaks were  
540 deemed differentially bound if absolute fold changes were above 1.5 and FDRs were less than  
541 0.01 for H3K27ac and Jun data, and FDR 0.05 for Myc data. Differential sites for H3K27ac, Jun  
542 and Myc are provided as source data.

543

#### 544 **Other data processing, analysis and visualization**

545 1. Correlation between RNA-Seq and the distribution of histone marks around  
546 Transcriptional Start Sites (TSSs).

547 A reference list of hg19 genes was downloaded from the UCSC Table Browser. Genes were  
548 oriented according to the directionality of gene transcription and specified a 2 kb window around  
549 TSSs. Genes that have an overlapping TSS within the 2 kb window and mitochondrial genes



550 were removed, creating a list of 22,222 TSSs. The gene list was sorted in descending order of  
551 their RNA-Seq FPKM values. CUT&RUN H3K27ac and H3K27me3 signal (merged from three  
552 replicates) were mapped on to the ordered genomic sites. The coverage of histone marks was  
553 quantified using bedtools coverage and converted to FPKM values. Correlation between RNA-  
554 Seq and histone mark FPKM values was calculated using R cor.test function  
555 (method=spearman).

- 556 2. Correlation matrices were generated using deepTools (Ramírez et al., 2016).
- 557 3. Gene set enrichment analysis (Gene Ontology terms) was done using the Enrichr web-  
558 based tool (Kuleshov et al., 2016).
- 559 4. Motif identification. For all motif analysis we used the The MEME Suite (Bailey et al.,  
560 2009). We used bedtools getfasta to generate FASTA files for genomic sites of interest  
561 (Quinlan & Hall, 2010). For motif discovery analysis we submitted the center 100 bp  
562 sequence of peaks to MEME-ChIP. MEME-ChIP was used with default parameters in  
563 Classic mode. HOCOMOCO Human (v11 FULL) motif database was used. We used the  
564 position-weight matrix (PWM) of the motif discovered by MEME-ChIP as the input for  
565 FIMO, to quantify the abundance of the motif. We used FIMO with a threshold value of  
566  $p.\text{value} \leq 0.01$  to capture all motif configurations and then filtered the output to select  
567 only the motifs with the highest FIMO motif scores (higher the score, similar to the input  
568 motif). For differential motif analysis, we used MEME-ChIP in Differential Enrichment  
569 mode with default parameters.
- 570 5. Annotations. To assign gene regions where peaks are located, we used CHIPseeker, an  
571 R/Bioconductor package (Yu et al., 2015). We used the nearest gene method to assign a  
572 peak to a gene using the bedtools closest tool (Quinlan & Hall, 2010). Gencode Human

573 Release 31 (GRCh37) Comprehensive gene annotation list was used to generate a list of  
574 genes with full gene coordinates which was used to annotate peaks to the nearest gene.

575 6. Data Visualization. Plots were generated using R (<https://www.r-project.org>) (R Core  
576 Team, 2020). Heatmaps were generated using Deeptools (Ramírez et al., 2016).

577 7. Venn diagrams. Intersection between genomic sites were generated using Intervene Venn  
578 module (A. Khan & Mathelier, 2017).

579 8. Primary cancer and cell line data analysis. CIITA expression data from Fbw7 WT and  
580 mutated colon and rectal cancers were collected from the TCGA COADREAD database  
581 via UCSC Xena browser (Goldman et al., 2020) (Figure 5 – source data 2). CIITA  
582 expression in Fbw7 WT and mutated colorectal cancer cell lines were collected from the  
583 DepMap Portal (<https://depmap.org/portal/>) (Barretina et al., 2012). Statistical analysis  
584 was performed on GraphPad Prism. Unpaired t-test (two tailed) was used to determine  
585 statistical significance of CIITA differential expression of TCGA and CCLE data sets.

586 9. Bigwig files (three replicates merged) were viewed on Integrative Genome Viewer to  
587 show examples of CUT&RUN binding data as peaks. Schematic figures were created  
588 with BioRender.com.

589

## 590 **Antibodies**

591 For CUT&RUN we used Rabbit anti-H3K27ac (1:100, Abcam Cat #ab45173), anti-H3K27me3  
592 (1:100, Cell Signaling Technologies Cat#9733S), Rabbit c-Jun (1:25, Santa Cruz Cat #sc-1694),  
593 Rabbit anti-Myc (1:25, Cell Signaling Technologies D3N8F Cat #13987), Rabbit anti-H3K4me1  
594 (1:100, Abcam Cat#ab8895), Rabbit anti-H3K4me2 (1:100, Cell Signaling Tech 9725) and

595 (Rabbit normal IgG (1:50, Santa Cruz sc-2027). For western blots and immunoprecipitation we  
596 used anti-Fbw7 Bethyl A301-720A.

### 597 **Cell culture**

598 Hct116 cells were grown in DMEM with 10% FBS and 5% PenStrep. For CUT&RUN and  
599 RNAseq experiments  $2 \times 10^6$  cells were plated per 10 cm dish two days prior to harvesting. Cells  
600 were harvested using Accutase. Human fetal tissue derived U5 NCSs were cultured in NeuroCult  
601 NS-A basal medium (Stem Cell Technologies) supplemented with N2 (made in-house 2x stock  
602 in Advanced DMEM/F-12 (Thermo Fisher Scientific)), B27 (Thermo Fisher Scientific),  
603 antibiotic-antimycotic (Thermo Fisher Scientific), glutamaz (Thermo Fisher Scientific), EGF and  
604 bFGF (Peprotech). Cells were cultured in Laminin coated plates. Accutase was used to harvest  
605 cells for experiments.

606

### 607 **Chromatin fractionation.**

608 Untreated and Bortezomib treated (0.5  $\mu$ M for 10 hrs.) cells were harvested and counted. Cells  
609 were resuspended in CSK buffer (10 mM HEPES pH 6.8, 100mM NaCl, 1mM EGTA, 1mM  
610 EDTA, 2mM MgCl<sub>2</sub>, 300mM Sucrose, 0.1% Triton X-100 and Protease inhibitor - 50  $\mu$ l per  
611 million cells) (Kim et al., 2008). Cells were allowed to lyse for 5 min on ice and centrifuged for  
612 5 min at 4<sup>0</sup>C at 1500 g. The supernatant which is the soluble fraction (S) was removed to a new  
613 tube. The pellet was resuspended in 1 ml of CSK buffer, centrifuged for 5 min at 4<sup>0</sup>C at 1500 g.  
614 The supernatant was thoroughly removed. Next, NP40 buffer with protease inhibitor and 250  
615 U/ml benzonase was added to the cell pellet (same volume as CSK buffer was used to lyse cells).  
616 Cells were incubated for 30 min on ice. This was the chromatin fraction (C). Both soluble and  
617 chromatin fractions were sonicated and centrifuged to remove debris (5 min at 4<sup>0</sup>C at maximum

618 speed). Total protein in all chromatin fractions was quantified using the Bradford assay and  
619 samples were normalized to total protein content. Equal volumes of chromatin and soluble  
620 fractions from each sample were used to immunoprecipitate Fbw7. Chromatin fractionation of  
621 Fbw7 was determined by >3 independent experiments.

622

### 623 **Immunoprecipitations and Western blot analysis of Fbw7.**

624 Whole cell extracts (WCE) were made by lysing cells in 0.5% NP-40 buffer with protease  
625 inhibitor cocktail (made in-house). Then WCE were sonicated and spun to remove debris. To  
626 immunoprecipitate Fbw7 from whole or fractionated cell lysates anti-Fbw7 Bethyl A301-720A  
627 antibody and Protein A beads were added and incubated for at least 2hrs at 4<sup>0</sup>C (overnight  
628 recommended). Beads were then washed 3X with 1 ml NP40 lysis buffer. Eluted protein was  
629 electrophoresed on 8% polyacrylamide gels and transferred to PVDF which was blotted against  
630 Fbw7 using anti-Fbw7 Bethyl A301-720A (1:1000) and HRP conjugated anti-Rabbit secondary  
631 antibody (1:10,000). Membranes treated with ECL (made in-house) were visualized on a BioRad  
632 ChemiDoc imaging system.

633

### 634 **PCR amplification of CIITA**

635 RNA was isolated from Hct116 and Raji cells using the Qiagen RNeasy Mini Kit (Cat # 74104).  
636 cDNA was prepared using the iScript Reverse Transcription Supermix (Cat # 1708841). CIITA  
637 PIII and PIV were amplified using specific primers (PIII : F –  
638 5’GCTGGGATTCTACACAATGC3’, R – 5’GGGTCTGAGTAGAGCTCAATC3’ and PIV :  
639 F – 5’GGGAGCCCGGGGAACA3’, R – 5’GATGGTGTCTGTGTCGGGTT3’) at 60<sup>0</sup>C  
640 annealing temperature for 38 cycles (H. Chen et al., 2015). GAPDH was amplified as the control

641 (25 cycles) using primers F – 5’GGTCGGAGTCAACGGATTTG3’ and R –  
642 5’ATGAGCCCCAGCCTTCTCCAT3’. Platinum Taq DNA polymerase was used following the  
643 manufacturer’s instructions.

644

#### 645 **Generation of U5-NSC homozygous Fbw7 knockouts**

646 A previously described protocol to generate homozygous null mutations using CRISPR-Cas9  
647 and nucleofection was followed (Hoellerbauer, Kufeld, & Paddison, 2020; Hoellerbauer, Kufeld,  
648 Arora, et al., 2020). Briefly the protocol is as follows:

649 CRISPR sgRNA were designed using Broad Institute’s GPP Web Portal. The output list of  
650 sgRNAs was manually curated to choose three sgRNAs targeting *FBXW7*. Exon 3, 4 and 9 in

651 *FBXW7* were targeted by 5’AAGAGCGGACCTCAGAACCA3’,

652 5’CTGAGGTCCCCAAAAGTTGT3’, 5’ACATTAGTGGGACATACAGG3’ guides

653 respectively. A control sgRNA was included 5’GTAGCGAACGTGTCCGGCGT3’. sgRNAs  
654 were purchased from Synthego.

655 Cas9:sgRNA RNP nucleofection: Reconstituted sgRNAs by adding 10uL of 1X TE Buffer

656 1.5nmol of dried sgRNA. A working stock of 30uM sgRNA was used henceforth. A working

657 stock of Cas9 (10.17 pmol/ul) was made. To prepare RNP complexes, sgRNA, sNLS-SpCas9-

658 sNLS (Aldevron) and SG Cell Line Nucleofector Solution (Lonza) were mixed in 1.87 uL, 1.84

659 uL and 18.29 uL respectively to make a 22 uL final volume. The mixture was incubated at room

660 temperature for 15 minutes to allow RNP complexes to form. To nucleofect, 0.13 x 10<sup>6</sup> cells

661 were harvested. The cells were washed with PBS and resuspended with RNPs. (We were able to

662 successfully nucleofect up to 0.85 x 10<sup>6</sup> cells with the same volume of RNPs.) Cells were

663 electroporated using the Amaxa 4D Nucleofector X unit and program EN-138. Nucleofected  
664 cells were plated in pre-warmed media.  
665 CRISPR editing efficiency analysis: Extraction of genomic DNA, PCR amplification of target  
666 site and efficiency analysis was done as previously described (Hoellerbauer, Kufeld, & Paddison,  
667 2020; Hoellerbauer, Kufeld, Arora, et al., 2020). The primer pairs used to amplify CRISPR target  
668 sites in Exon 3: 5'TCATCACACACTGTTCTTCTGGA3' and  
669 5'TGTCTACCCTAGAACAGCTGT3', Exon 4: 5'TGTGTACCTGTGATCTCTGGG3' and  
670 5'CACCTTGCTGTGCAACCATC3', Exon 9: 5'ACTGCTTTCATGTCGTGTTTCC3' and  
671 5'AGGAAGCTGACAACACTAGCA3'. We found that the pool of three sgRNA was the most  
672 successful at deleting *FBXW7*. It was confirmed by blotting for immunoprecipitated Fbw7 in  
673 each nucleofected sample (Figure 6 – figure supplement 1).

674

675 **Data Availability:** All data generated and used in this manuscript are deposited in GEO:  
676 GSE184041

677

678 Scripts available at <https://github.com/hnthirima>

679

680 The results shown here are in part based upon data generated by the TCGA Research Network:  
681 <https://www.cancer.gov/tcga>

682

### 683 **Supplemental Figures:**

684 Figure 1 – figure supplement 1

685 Figure 2 – figure supplement 1

686 Figure 2 – figure supplement 2

687 Figure 2 – figure supplement 3

688 Figure 3 – figure supplement 1

689 Figure 3 – figure supplement 2

690 Figure 3 – figure supplement 3

691 Figure 3 – figure supplement 4

692 Figure 4 – figure supplement 1

693 Figure 5 – figure supplement 1

694 Figure 6 – figure supplement 1

695 Figure 6 – figure supplement 2

696 Figure 6 – figure supplement 3

697

698 **Source data files (with title and legend):**

699

700 **Figure 1 - source data 1: Differential expression analysis of Hct116 RNA-Seq.** This excel file  
701 contains the differential analysis output of Hct116 RNA-Seq data from WT, Fbw7<sup>-/-</sup> (Del) and  
702 Fbw7<sup>R/+</sup> (R). DE = 0, not differentially expressed in the mutant compared to WT; DE = 1,  
703 differentially expressed in the mutant compared to WT.

704

705 **Figure 1 - source data 2: Hierarchical cluster output file.** This excel file includes genes that  
706 belong to each cluster in the hierarchical cluster analysis.

707

708 **Figure 1- source data 3: Enrichr output for Hct116 differentially expressed genes.** This  
709 excel file includes the GO Terms enriched in differential genes unique to Fbw7<sup>-/-</sup> (Cluster 1 and  
710 2) and, common to Fbw7<sup>-/-</sup> and Fbw7<sup>R/+</sup> (Cluster 3 and 4). Genes in each GO Term are listed  
711 along with P-value and Adjusted P-value.

712

713 **Figure 2 – source data 1: H3K27ac differential sites.** This excel file includes lists of peaks  
714 with increased and decreased H3K27ac signal in Hct116 Fbw7<sup>-/-</sup> and Fbw7<sup>R/+</sup> relative to WT.  
715 Fold change and FDR listed for each peak.

716

717 **Figure 2 – source data 2: Summary of CUT&RUN differential sites.** This excel file includes  
718 a summary (total number of differential sites, percentage, number of annotated genes) of  
719 H3K27ac, Jun and Myc differential sites in Hct116 cells and Jun differential sites in U5-NSCs.

720

721 **Figure 3 – source data 1: Original western blots for Figure 3A and Figure 3 – figure  
722 supplement 1.**

723

724 **Figure 3 – source data 2: Jun and Myc differential sites in Hct116 cells.** This excel file  
725 includes lists of peaks with increased and decreased Jun and Myc signal in Hct116 Fbw7<sup>-/-</sup> and  
726 Fbw7<sup>R/+</sup> relative to WT. Fold change and FDR listed for each peak.

727

728 **Figure 5 – source data 1: Original gels for Figure 5C.**

729

730 **Figure 5 – source data 2: TCGA COADREAD data used for Figure 5D.** This excel file  
731 includes the CIITA expression counts for WT and Fbw7-mutant Colorectal tumors.

732

733 **Figure 5 – source data 3: Colorectal cancer cell line data from DepMap used for Figure 5E.**

734

735 **Figure 6 – source data 1: Confirming loss of Fbw7 in U5-NSC Fbw7<sup>-/-</sup> cells.** This folder  
736 contains the original western blots for Figure 6 – figure supplement 1A. Western blots that  
737 confirm the loss of Fbw7 in two other separately performed nucleofection reactions are also  
738 included.

739

740 **Figure 6 – source data 2: Differential expression analysis of U5-NSC RNA-Seq.** This excel  
741 file contains the differential analysis output of U5-NSC RNA-Seq data from control (Ctrl23,  
742 Ctrl4.1, Ctrl4.2) and Fbw7<sup>-/-</sup> (Fb23, Fb4.1, Fb4.2) cells. DE = 0, not differentially expressed in  
743 the mutant compared to WT; DE = 1, differentially expressed in the mutant compared to WT.

744

745 **Figure 6 – source data 3: Enrichr output for U5-NSC differentially expressed genes.** Genes  
746 in each GO Term are listed along with P-value and Adjusted P-value.

747

748 **Figure 6 – source data 4: Jun differential sites in U5-NSCs.** (U5F= Fbw7<sup>-/-</sup> and U5W = WT)

749

750 **Figure 6 – source data 5: Original gels for Figure 6 – figure supplement 3.**

751

752 **Additional source data 1: Summary of all CUT&RUN experiments.** Experimental conditions  
753 of all CUT&RUN experiments included in the study.

754

## 755 **Competing Interest Statement**

756 B.E.C is a consultant and equity holder for Coho Therapeutics, a start-up biotechnology  
757 company.

758 All other authors have no competing interests.

759

## 760 **Acknowledgments**

761 This research was supported by the following grants: NCI/NIH T32 CA080416 (H.N.T.),

762 NCI/NIH R01 CA215647 (B.E.C.), R01 HG010492 (S.H.), R01NS119650 and R01 CA190957

763 (P.J.P) and the Genomics & Bioinformatics Shared Resource of the Fred Hutch/University of

764 Washington Cancer Consortium (P30 CA015704).

765



766 We thank Jeff Delrow, Matthew Fitzgibbon, Alyssa Dawson and Philip Corrin in the Genomics  
767 Shared Resources at Fred Hutchinson Cancer Research Center for support with experimental  
768 design, helpful discussions, library preparation and sequencing. We thank Markus Welcker and  
769 Ahmed Diab for helpful discussions and critical reading of the manuscript. We thank past and  
770 present Henikoff lab members including Jorja Henikoff, Christine Codomo, Michael Meers, Jay  
771 Sarthy, Terri Bryson and Peter Skene for helpful discussions regarding data analysis, reagents,  
772 library preparation and sequencing. We also thank Pia Hoellerbauer in Paddison lab for  
773 assistance with neural stem cell culturing and knockout generation.

774

775

776 **References**

- 777 Axelrod, M. L., Cook, R. S., Johnson, D. B., & Balko, J. M. (2019). Biological consequences of  
778 MHC-II expression by tumor cells in cancer. *Clinical Cancer Research*, 25(8), 2392–2402.  
779 <https://doi.org/10.1158/1078-0432.CCR-18-3200>
- 780 Bailey, T. L., Boden, M., Buske, F. A., Frith, M., Grant, C. E., Clementi, L., Ren, J., Li, W. W.,  
781 & Noble, W. S. (2009). MEME Suite: Tools for motif discovery and searching. *Nucleic  
782 Acids Research*, 37(SUPPL. 2), 202–208. <https://doi.org/10.1093/nar/gkp335>
- 783 Barretina, J., Caponigro, G., Stransky, N., Venkatesan, K., Margolin, A. A., Kim, S., Wilson, C.  
784 J., Lehár, J., Kryukov, G. V., Sonkin, D., Reddy, A., Liu, M., Murray, L., Berger, M. F.,  
785 Monahan, J. E., Morais, P., Meltzer, J., Korejwa, A., Jané-Valbuena, J., ... Garraway, L. A.  
786 (2012). The Cancer Cell Line Encyclopedia enables predictive modelling of anticancer drug  
787 sensitivity. *Nature*, 483(7391), 603–607. <https://doi.org/10.1038/nature11003>
- 788 Chen, E. Y., Tan, C. M., Kou, Y., Duan, Q., Wang, Z., Meirelles, G. V., Clark, N. R., &  
789 Ma'ayan, A. (2013). Enrichr: Interactive and collaborative HTML5 gene list enrichment  
790 analysis tool. *BMC Bioinformatics*, 14. <https://doi.org/10.1186/1471-2105-14-128>
- 791 Chen, H., Li, Y., Lin, X., Cui, D., Cui, C., Li, H., & Xiao, L. (2015). Functional disruption of  
792 human leukocyte antigen II in human embryonic stem cell. *Biological Research*, 48, 1–9.  
793 <https://doi.org/10.1186/s40659-015-0051-6>
- 794 Cremona, C. A., Sancho, R., Diefenbacher, M. E., & Behrens, A. (2016). Fbw7 and its  
795 counteracting forces in stem cells and cancer: Oncoproteins in the balance. *Seminars in  
796 Cancer Biology*, 36, 52–61. <https://doi.org/10.1016/j.semcancer.2015.09.006>
- 797 Csizmok, V., Montecchio, M., Lin, H., Tyers, M., Sunnerhagen, M., & Forman-Kay, J. D.  
798 (2018). Multivalent Interactions with Fbw7 and Pin1 Facilitate Recognition of c-Jun by the

- 799 SCFFbw7 Ubiquitin Ligase. *Structure*, 26(1), 28-39.e2.  
800 <https://doi.org/10.1016/j.str.2017.11.003>
- 801 Davis, H., & Tomlinson, I. (2012). CDC4/FBXW7 and the “just enough” model of  
802 tumorigenesis. *Journal of Pathology*, 227(2), 131–135. <https://doi.org/10.1002/path.4004>
- 803 Davis, M. A., Larimore, E. A., Fissel, B. M., Swanger, J., Taatjes, D. J., & Clurman, B. E.  
804 (2013). The SCF-Fbw7 ubiquitin ligase degrades MED13 and MED13L and regulates  
805 CDK8 module association with Mediator. *Genes and Development*, 27(2), 151–156.  
806 <https://doi.org/10.1101/gad.207720.112>
- 807 Davis, R. J., Gönen, M., Margineantu, D. H., Handeli, S., Swanger, J., Hoellerbauer, P.,  
808 Paddison, P. J., Gu, H., Raftery, D., Grim, J. E., Hockenbery, D. M., Margolin, A. A., &  
809 Clurman, B. E. (2018). Pan-cancer transcriptional signatures predictive of oncogenic  
810 mutations reveal that Fbw7 regulates cancer cell oxidative metabolism. *Proceedings of the*  
811 *National Academy of Sciences of the United States of America*, 115(21), 5462–5467.  
812 <https://doi.org/10.1073/pnas.1718338115>
- 813 Davis, R. J., Welcker, M., & Clurman, B. E. (2014). Tumor suppression by the Fbw7 ubiquitin  
814 ligase: mechanisms and opportunities. *Cancer Cell*, 26(4), 455–464.  
815 <https://doi.org/10.1016/j.ccell.2014.09.013>
- 816 Deffrennes, V., Vedrenne, J., Stolzenberg, M.-C., Piskurich, J., Barbieri, G., Ting, J. P., Charron,  
817 D., & Alcaïde-Loridan, C. (2001). Constitutive Expression of MHC Class II Genes in  
818 Melanoma Cell Lines Results from the Transcription of Class II Transactivator Abnormally  
819 Initiated from Its B Cell-Specific Promoter. *The Journal of Immunology*, 167(1), 98–106.  
820 <https://doi.org/10.4049/jimmunol.167.1.98>
- 821 Deshaies, R. J., & Joazeiro, C. A. P. (2009). RING domain E3 ubiquitin ligases. *Annual Review*

- 822        of *Biochemistry*, 78, 399–434. <https://doi.org/10.1146/annurev.biochem.78.101807.093809>
- 823 Diefenbacher, M. E., Popov, N., Blake, S. M., Schülein-Völk, C., Nye, E., Spencer-Dene, B.,  
824        Jaenicke, L. A., Eilers, M., & Behrens, A. (2014). The deubiquitinase USP28 controls  
825        intestinal homeostasis and promotes Colorectal cancer. *Journal of Clinical Investigation*,  
826        124(8), 3407–3418. <https://doi.org/10.1172/JCI73733>
- 827 Dobin, A., Davis, C. A., Schlesinger, F., Drenkow, J., Zaleski, C., Jha, S., Batut, P., Chaisson,  
828        M., & Gingeras, T. R. (2013). STAR: Ultrafast universal RNA-seq aligner. *Bioinformatics*,  
829        29(1), 15–21. <https://doi.org/10.1093/bioinformatics/bts635>
- 830 Endres, T., Solvie, D., Heidelberger, J. B., Andrioletti, V., Baluapuri, A., Ade, C. P., Muhar, M.,  
831        Eilers, U., Vos, S. M., Cramer, P., Zuber, J., Beli, P., Popov, N., Wolf, E., Gallant, P., &  
832        Eilers, M. (2021). Ubiquitylation of MYC couples transcription elongation with double-  
833        strand break repair at active promoters. *Molecular Cell*, 81(4), 830-844.e13.  
834        <https://doi.org/10.1016/j.molcel.2020.12.035>
- 835 Fryer, C. J., White, J. B., & Jones, K. A. (2004). Mastermind recruits CycC:CDK8 to  
836        phosphorylate the Notch ICD and coordinate activation with turnover. *Molecular Cell*,  
837        16(4), 509–520. <https://doi.org/10.1016/j.molcel.2004.10.014>
- 838 Ghandi, M., Huang, F. W., Jané-Valbuena, J., Kryukov, G. V., Lo, C. C., McDonald, E. R.,  
839        Barretina, J., Gelfand, E. T., Bielski, C. M., Li, H., Hu, K., Andreev-Drakhlin, A. Y., Kim,  
840        J., Hess, J. M., Haas, B. J., Aguet, F., Weir, B. A., Rothberg, M. V., Paolella, B. R., ...  
841        Sellers, W. R. (2019). Next-generation characterization of the Cancer Cell Line  
842        Encyclopedia. *Nature*, 569(7757), 503–508. <https://doi.org/10.1038/s41586-019-1186-3>
- 843 Goldman, M. J., Craft, B., Hastie, M., Mcdade, F., Banerjee, A., Luo, Y., Rogers, D., Brooks, A.  
844        N., Haussler, D., Cruz, S., Cruz, S., & Cruz, S. (2020). *Visualizing and interpreting cancer*

845 *genomics data via the Xena platform*. 38(6), 675–678. <https://doi.org/10.1038/s41587-020->  
846 0546-8. Visualizing  
847 Grim, J. E., Gustafson, M. P., Hirata, R. K., Hagar, A. C., Swanger, J., Welcker, M., Hwang, H.  
848 C., Ericsson, J., Russell, D. W., & Clurman, B. E. (2008). Isoform- and cell cycle-  
849 dependent substrate degradation by the Fbw7 ubiquitin ligase. *Journal of Cell Biology*,  
850 181(6), 913–920. <https://doi.org/10.1083/jcb.200802076>  
851 Gstalder, C., Liu, D., Miao, D., Lutterbach, B., Devine, A. L., Lin, C., Shettigar, M., Pancholi,  
852 P., Buchbinder, E. I., Carter, S. L., Manos, M. P., Rojas-Rudilla, V., Brennick, R., Gjini, E.,  
853 Chen, P. H., Lako, A., Rodig, S., Yoon, C. H., Freeman, G. J., ... Haq, R. (2020).  
854 Inactivation of fbxw7 impairs dsrna sensing and confers resistance to pd-1 blockade.  
855 *Cancer Discovery*, 10(9), 1296–1311. <https://doi.org/10.1158/2159-8290.CD-19-1416>  
856 Gupta, S., Seth, A., & Davis, R. J. (1993). Transactivation of gene expression by Myc is  
857 inhibited by mutation at the phosphorylation sites Thr-58 and Ser-62. *Proceedings of the*  
858 *National Academy of Sciences of the United States of America*, 90(8), 3216–3220.  
859 <https://doi.org/10.1073/pnas.90.8.3216>  
860 Hagedorn, M., Delugin, M., Abraldes, I., Allain, N., Belaud-Rotureau, M. A., Turmo, M.,  
861 Prigent, C., Loiseau, H., Bikfalvi, A., & Javerzat, S. (2007). FBXW7/hCDC4 controls  
862 glioma cell proliferation in vitro and is a prognostic marker for survival in glioblastoma  
863 patients. *Cell Division*, 2, 1–12. <https://doi.org/10.1186/1747-1028-2-9>  
864 Hao, B., Oehlmann, S., Sowa, M. E., Harper, J. W., & Pavletich, N. P. (2007). Structure of a  
865 Fbw7-Skp1-Cyclin E Complex: Multisite-Phosphorylated Substrate Recognition by SCF  
866 Ubiquitin Ligases. *Molecular Cell*, 26(1), 131–143.  
867 <https://doi.org/10.1016/j.molcel.2007.02.022>

- 868 Hemann, M. T., Bric, A., Teruya-Feldstein, J., Herbst, A., Nilsson, J. A., Cordon-Cardo, C.,  
869 Cleveland, J. L., Tansey, W. P., & Lowe, S. W. (2005). Evasion of the p53 tumour  
870 surveillance network by tumour-derived MYC mutants. *Nature*, *436*(7052), 807–811.  
871 <https://doi.org/10.1038/nature03845>
- 872 Hoeck, J. D., Jandke, A., Blake, S. M., Nye, E., Spencer-Dene, B., Brandner, S., & Behrens, A.  
873 (2010). Fbw7 controls neural stem cell differentiation and progenitor apoptosis via Notch  
874 and c-Jun. *Nature Neuroscience*, *13*(11), 1365–1372. <https://doi.org/10.1038/nn.2644>
- 875 Hoellerbauer, P., Kufeld, M., Arora, S., Wu, H. J., Feldman, H. M., & Paddison, P. J. (2020). A  
876 simple and highly efficient method for multi-allelic CRISPR-Cas9 editing in primary cell  
877 cultures. *Cancer Reports*, *3*(5), 1–14. <https://doi.org/10.1002/cnr2.1269>
- 878 Hoellerbauer, P., Kufeld, M., & Paddison, P. J. (2020). Efficient Multi-Allelic Genome Editing  
879 of Primary Cell Cultures via CRISPR-Cas9 Ribonucleoprotein Nucleofection. *Current*  
880 *Protocols in Stem Cell Biology*, *54*(1), e126. <https://doi.org/10.1002/cpsc.126>
- 881 Jaenicke, L. A., von Eyss, B., Carstensen, A., Wolf, E., Xu, W., Greifenberg, A. K., Geyer, M.,  
882 Eilers, M., & Popov, N. (2016). Ubiquitin-Dependent Turnover of MYC Antagonizes  
883 MYC/PAF1C Complex Accumulation to Drive Transcriptional Elongation. *Molecular Cell*,  
884 *61*(1), 54–67. <https://doi.org/10.1016/j.molcel.2015.11.007>
- 885 Janssens, D. H., Wu, S. J., Sarthy, J. F., Meers, M. P., Myers, C. H., Olson, J. M., Ahmad, K., &  
886 Henikoff, S. (2018). Automated in situ chromatin profiling efficiently resolves cell types  
887 and gene regulatory programs. *Epigenetics and Chromatin*, *11*(1), 1–14.  
888 <https://doi.org/10.1186/s13072-018-0243-8>
- 889 Karlić, R., Chung, H. R., Lasserre, J., Vlahoviček, K., & Vingron, M. (2010). Histone  
890 modification levels are predictive for gene expression. *Proceedings of the National*

- 891 *Academy of Sciences of the United States of America*, 107(7), 2926–2931.  
892 <https://doi.org/10.1073/pnas.0909344107>
- 893 Khan, A., & Mathelier, A. (2017). Intervene: A tool for intersection and visualization of multiple  
894 gene or genomic region sets. *BMC Bioinformatics*, 18(1), 1–8.  
895 <https://doi.org/10.1186/s12859-017-1708-7>
- 896 Khan, O. M., Carvalho, J., Spencer-Dene, B., Mitter, R., Frith, D., Snijders, A. P., Wood, S. A.,  
897 & Behrens, A. (2018). The deubiquitinase USP9X regulates FBW7 stability and suppresses  
898 colorectal cancer. *Journal of Clinical Investigation*, 128(4), 1326–1337.  
899 <https://doi.org/10.1172/JCI97325>
- 900 Kim, J. M., Kee, Y., Gurtan, A., & D’Andrea, A. D. (2008). Cell cycle-dependent chromatin  
901 loading of the Fanconi anemia core complex by FANCM/FAAP24. *Blood*, 111(10), 5215–  
902 5222. <https://doi.org/10.1182/blood-2007-09-113092>
- 903 King, B., Trimarchi, T., Reavie, L., Xu, L., Mullenders, J., Ntziachristos, P., Aranda-Orgilles, B.,  
904 Perez-Garcia, A., Shi, J., Vakoc, C., Sandy, P., Shen, S. S., Ferrando, A., & Aifantis, I.  
905 (2013). The ubiquitin ligase FBXW7 modulates leukemia-initiating cell activity by  
906 regulating MYC stability. *Cell*, 153(7), 1552. <https://doi.org/10.1016/j.cell.2013.05.041>
- 907 Kuleshov, M. V., Jones, M. R., Rouillard, A. D., Fernandez, N. F., Duan, Q., Wang, Z., Koplev,  
908 S., Jenkins, S. L., Jagodnik, K. M., Lachmann, A., McDermott, M. G., Monteiro, C. D.,  
909 Gundersen, G. W., & Ma’ayan, A. (2016). Enrichr: a comprehensive gene set enrichment  
910 analysis web server 2016 update. *Nucleic Acids Research*, 44(W1), W90–W97.  
911 <https://doi.org/10.1093/nar/gkw377>
- 912 Lee, E. K., & Diehl, J. A. (2014). SCFs in the new millennium. *Oncogene*, 33(16), 2011–2018.  
913 <https://doi.org/10.1038/onc.2013.144>

- 914 Liao, Y., Smyth, G. K., & Shi, W. (2014). FeatureCounts: An efficient general purpose program  
915 for assigning sequence reads to genomic features. *Bioinformatics*, 30(7), 923–930.  
916 <https://doi.org/10.1093/bioinformatics/btt656>
- 917 Martins, I., Deshayes, F., Baton, F., Gorget, A., Ciechomska, I., Sylla, K., Aoudjit, F., Charron,  
918 D., Al-Daccak, R., & Alcaide-Loridan, C. (2007). Pathologic expression of MHC class II is  
919 driven by mitogen-activated protein kinases. *European Journal of Immunology*, 37(3), 788–  
920 797. <https://doi.org/10.1002/eji.200636620>
- 921 Masternak, K., Muhlethaler-Mottet, A., Villard, J., Zufferey, M., Steimle, V., & Reith, W.  
922 (2000). CIITA is a transcriptional coactivator that is recruited to MHC class II promoters by  
923 multiple synergistic interactions with an enhanceosome complex. *Genes and Development*,  
924 14(9), 1156–1166. <https://doi.org/10.1101/gad.14.9.1156>
- 925 Muhlethaler-Mottet, A., Otten, L. A., Steimle, V., & Mach, B. (1997). Expression of MHC class  
926 II molecules in different cellular and functional compartments is controlled by differential  
927 usage of multiple promoters of the transactivator CIITA. *EMBO Journal*, 16(10), 2851–  
928 2860. <https://doi.org/10.1093/emboj/16.10.2851>
- 929 Muzny, D. M., Bainbridge, M. N., Chang, K., Dinh, H. H., Drummond, J. A., Fowler, G., Kovar,  
930 C. L., Lewis, L. R., Morgan, M. B., Newsham, I. F., Reid, J. G., Santibanez, J., Shinbrot, E.,  
931 Trevino, L. R., Wu, Y. Q., Wang, M., Gunaratne, P., Donehower, L. A., Creighton, C. J., ...  
932 Thomson, E. (2012). Comprehensive molecular characterization of human colon and rectal  
933 cancer. *Nature*, 487(7407), 330–337. <https://doi.org/10.1038/nature11252>
- 934 Nash, P., Tang, X., Orlicky, S., Chen, Q., Gertler, F. B., Mendenhall, M. D., Sicheri, F., Pawson,  
935 T., & Tyers, M. (2001). Multisite phosphorylation of a CDK inhibitor sets a threshold for  
936 the onset of DNA replication. *Nature*, 414(6863), 514–521.



- 937 <https://doi.org/10.1038/35107009>
- 938 Nateri, A. S., Riera-Sans, L., Da, C. C., & Behrens, A. (2004). The ubiquitin ligase SCFFbw7  
939 antagonizes apoptotic JNK signaling. *Science*, *303*(5662), 1374–1378.  
940 <https://doi.org/10.1126/science.1092880>
- 941 Orlicky, S., Tang, X., Willems, A., Tyers, M., & Sicheri, F. (2003). Structural basis for  
942 phosphodependent substrate selection and orientation by the SCFCdc4 ubiquitin ligase.  
943 *Cell*, *112*(2), 243–256. [https://doi.org/10.1016/S0092-8674\(03\)00034-5](https://doi.org/10.1016/S0092-8674(03)00034-5)
- 944 Priyadarshini, R., Hussain, M., Attri, P., Kaur, E., Tripathi, V., Priya, S., Dhapola, P., Saha, D.,  
945 Madhavan, V., Chowdhury, S., & Sengupta, S. (2018). BLM Potentiates c-Jun Degradation  
946 and Alters Its Function as an Oncogenic Transcription Factor. *Cell Reports*, *24*(4), 947-  
947 961.e7. <https://doi.org/10.1016/j.celrep.2018.06.101>
- 948 Punga, T., Bengoechea-Alonso, M. T., & Ericsson, J. (2006). Phosphorylation and ubiquitination  
949 of the transcription factor sterol regulatory element-binding protein-1 in response to DNA  
950 binding. *Journal of Biological Chemistry*, *281*(35), 25278–25286.  
951 <https://doi.org/10.1074/jbc.M604983200>
- 952 Quinlan, A. R., & Hall, I. M. (2010). BEDTools: A flexible suite of utilities for comparing  
953 genomic features. *Bioinformatics*, *26*(6), 841–842.  
954 <https://doi.org/10.1093/bioinformatics/btq033>
- 955 R Core Team. (2020). R: A language and environment for statistical computing. *R Foundation*  
956 *for Statistical Computing, Vienna, Austria*.
- 957 Ramírez, F., Ryan, D. P., Grüning, B., Bhardwaj, V., Kilpert, F., Richter, A. S., Heyne, S.,  
958 Dündar, F., & Manke, T. (2016). deepTools2: a next generation web server for deep-  
959 sequencing data analysis. *Nucleic Acids Research*, *44*(W1), W160–W165.

- 960 <https://doi.org/10.1093/nar/gkw257>
- 961 Reavie, L., Buckley, S. M., Loizou, E., Takeishi, S., Aranda-Orgilles, B., Ndiaye-Lobry, D.,  
962 Abdel-Wahab, O., Ibrahim, S., Nakayama, K. I., & Aifantis, I. (2013). Regulation of c-Myc  
963 ubiquitination controls chronic myelogenous leukemia initiation and progression. *Cancer*  
964 *Cell*, 23(3), 362–375. <https://doi.org/10.1016/j.ccr.2013.01.025>
- 965 Reith, W., LeibundGut-Landmann, S., & Waldburger, J. M. (2005). Regulation of MHC class II  
966 gene expression by the class II transactivator. *Nature Reviews Immunology*, 5(10), 793–806.  
967 <https://doi.org/10.1038/nri1708>
- 968 Robinson, M. D., McCarthy, D. J., & Smyth, G. K. (2009). edgeR: A Bioconductor package for  
969 differential expression analysis of digital gene expression data. *Bioinformatics*, 26(1), 139–  
970 140. <https://doi.org/10.1093/bioinformatics/btp616>
- 971 Robinson, M. D., & Oshlack, A. (2010). A scaling normalization method for  
972 differentialexpression analysis of RNA-seq data. *Genome Biology*, 11(3), 1–9.  
973 <http://genomebiology.com/2010/11/3/R25>
- 974 Sconocchia, G., Eppenberger-Castori, S., Zlobec, I., Karamitopoulou, E., Arriga, R., Coppola,  
975 A., Caratelli, S., Spagnoli, G. C., Lauro, D., Lugli, A., Han, J., Iezzi, G., Ferrone, C.,  
976 Ferlosio, A., Tornillo, L., Drosler, R., Rossi, P., Attanasio, A., Ferrone, S., & Terracciano,  
977 L. (2014). HLA class II antigen expression in colorectal carcinoma tumors as a favorable  
978 prognostic marker. *Neoplasia (United States)*, 16(1), 31–42.  
979 <https://doi.org/10.1593/neo.131568>
- 980 Shimizu, K., Nihira, N. T., Inuzuka, H., & Wei, W. (2018). Physiological functions of FBW7 in  
981 cancer and metabolism. *Cellular Signalling*, 46(February), 15–22.  
982 <https://doi.org/10.1016/j.cellsig.2018.02.009>

- 983 Skaar, J. R., Pagan, J. K., & Pagano, M. (2013). Mechanisms and function of substrate  
984 recruitment by F-box proteins. *Nature Reviews. Molecular Cell Biology*, *14*(6), 369–381.  
985 <https://doi.org/10.1038/nrm3582>
- 986 Skene, P. J., Henikoff, J. G., & Henikoff, S. (2018). Targeted in situ genome-wide profiling with  
987 high efficiency for low cell numbers. *Nature Protocols*, *13*(5), 1006–1019.  
988 <https://doi.org/10.1038/nprot.2018.015>
- 989 Skene, P. J., & Henikoff, S. (2017). An efficient targeted nuclease strategy for high-resolution  
990 mapping of DNA binding sites. *ELife*, *6*, 1–35. <https://doi.org/10.7554/eLife.21856>
- 991 Sundqvist, A., Bengoechea-Alonso, M. T., Ye, X., Lukiyanchuk, V., Jin, J., Harper, J. W., &  
992 Ericsson, J. (2005). Control of lipid metabolism by phosphorylation-dependent degradation  
993 of the SREBP family of transcription factors by SCFFbw7. *Cell Metabolism*, *1*(6), 379–391.  
994 <https://doi.org/10.1016/j.cmet.2005.04.010>
- 995 Tan, Y. M., Sangfelt, O., & Spruck, C. (2008). The Fbxw7/hCdc4 tumor suppressor in human  
996 cancer. *Cancer Letters*, *271*(1), 1–12. <https://doi.org/10.1016/j.canlet.2008.04.036>
- 997 Thomas, L. R., & Tansey, W. P. (2011). Proteolytic Control of the Oncoprotein Transcription  
998 Factor Myc. In *Advances in Cancer Research* (Vol. 110). Elsevier Inc.  
999 <https://doi.org/10.1016/B978-0-12-386469-7.00004-9>
- 1000 Ting, J. P. Y., & Trowsdale, J. (2002). Genetic control of MHC class II expression. *Cell*, *109*(2  
1001 SUPPL. 1), 21–33. [https://doi.org/10.1016/S0092-8674\(02\)00696-7](https://doi.org/10.1016/S0092-8674(02)00696-7)
- 1002 van der Stoep, N., Quinten, E., Alblas, G., Plancke, A., van Eggermond, M. C. J. A., Holling, T.  
1003 M., & van den Elsen, P. J. (2007). Constitutive and IFN $\gamma$ -induced activation of MHC2TA  
1004 promoter type III in human melanoma cell lines is governed by separate regulatory elements  
1005 within the PIII upstream regulatory region. *Molecular Immunology*, *44*(8), 2036–2046.

- 1006 <https://doi.org/10.1016/j.molimm.2006.09.013>
- 1007 Wang, L., Wang, S., & Li, W. (2012). RSeQC: Quality control of RNA-seq experiments.
- 1008 *Bioinformatics*, 28(16), 2184–2185. <https://doi.org/10.1093/bioinformatics/bts356>
- 1009 Wei, W., Jin, J., Schlisio, S., Harper, J. W., & Kaelin, W. G. (2005). The v-Jun point mutation
- 1010 allows c-Jun to escape GSK3-dependent recognition and destruction by the Fbw7 ubiquitin
- 1011 ligase. *Cancer Cell*, 8(1), 25–33. <https://doi.org/10.1016/j.ccr.2005.06.005>
- 1012 Welcker, M., & Clurman, B. E. (2007). Fbw7/hCDC4 dimerization regulates its substrate
- 1013 interactions. *Cell Division*, 2, 7. <https://doi.org/10.1186/1747-1028-2-7>
- 1014 Welcker, M., & Clurman, B. E. (2008). FBW7 ubiquitin ligase: A tumour suppressor at the
- 1015 crossroads of cell division, growth and differentiation. *Nature Reviews Cancer*, 8(2), 83–93.
- 1016 <https://doi.org/10.1038/nrc2290>
- 1017 Welcker, M., Larimore, E. A., Swanger, J., Bengoechea-Alonso, M. T., Grim, J. E., Ericsson, J.,
- 1018 Zheng, N., & Clurman, B. E. (2013). Fbw7 dimerization determines the specificity and
- 1019 robustness of substrate degradation. *Genes and Development*, 27(23), 2531–2536.
- 1020 <https://doi.org/10.1101/gad.229195.113>
- 1021 Welcker, M., Orian, A., Jin, J., Grim, J. E., Grim, J. A., Harper, J. W., Eisenman, R. N., &
- 1022 Clurman, B. E. (2004). The Fbw7 tumor suppressor regulates glycogen synthase kinase 3
- 1023 phosphorylation-dependent c-Myc protein degradation. *Proceedings of the National*
- 1024 *Academy of Sciences of the United States of America*, 101(24), 9085–9090.
- 1025 <https://doi.org/10.1073/pnas.0402770101>
- 1026 Yada, M., Hatakeyama, S., Kamura, T., Nishiyama, M., Tsunematsu, R., Imaki, H., Ishida, N.,
- 1027 Okumura, F., Nakayama, K., & Nakayama, K. I. (2004). Phosphorylation-dependent
- 1028 degradation of c-Myc is mediated by the F-box protein Fbw7. *EMBO Journal*, 23(10),

- 1029 2116–2125. <https://doi.org/10.1038/sj.emboj.7600217>
- 1030 Yeh, C. H., Bellon, M., & Nicot, C. (2018). FBXW7: A critical tumor suppressor of human  
1031 cancers. *Molecular Cancer*, *17*(1), 1–19. <https://doi.org/10.1186/s12943-018-0857-2>
- 1032 Yu, G., Wang, L. G., & He, Q. Y. (2015). ChIP seeker: An R/Bioconductor package for ChIP  
1033 peak annotation, comparison and visualization. *Bioinformatics*, *31*(14), 2382–2383.  
1034 <https://doi.org/10.1093/bioinformatics/btv145>
- 1035 Yumimoto, K., Akiyoshi, S., Ueo, H., Sagara, Y., Onoyama, I., Ueo, H., Ohno, S., Mori, M.,  
1036 Mimori, K., & Nakayama, K. I. (2015). F-box protein FBXW7 inhibits cancer metastasis in  
1037 a non-cell-autonomous manner. *Journal of Clinical Investigation*, *125*(2), 621–635.  
1038 <https://doi.org/10.1172/JCI78782>
- 1039 Yumimoto, K., & Nakayama, K. I. (2020). Recent insight into the role of FBXW7 as a tumor  
1040 suppressor. *Seminars in Cancer Biology*, *67*(November 2019), 1–15.  
1041 <https://doi.org/10.1016/j.semcancer.2020.02.017>
- 1042 Zhang, J., Zhu, F., Li, X., Dong, Z., Xu, Y., Peng, C., Li, S., Cho, Y. Y., Yao, K., Zykova, T. A.,  
1043 Bode, A. M., & Dong, Z. (2012). Rack1 protects N-terminal phosphorylated c-Jun from  
1044 Fbw7-mediated degradation. *Oncogene*, *31*(14), 1835–1844.  
1045 <https://doi.org/10.1038/onc.2011.369>
- 1046

1 **Figure 1 – figure supplement 1**

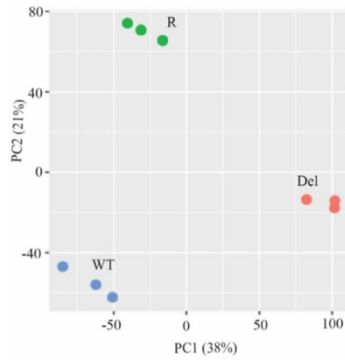

2 **Principal Component Analysis (PCA) of RNA-Seq from Hct116 cells.**

3 Hct116 wild-type (WT), Fbw7<sup>-/-</sup> (Del) and Fbw7<sup>R/+</sup> (R) samples separate by genotype. Replicates from each  
4 condition are clustered together.

- 5
- 6
- 7
- 8
- 9
- 10
- 11
- 12
- 13
- 14
- 15
- 16
- 17
- 18
- 19
- 20
- 21
- 22
- 23
- 24

25 **Figure 2 – figure supplement 1**

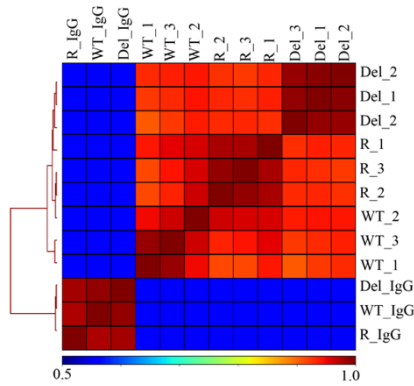

26

27 **Hierarchically clustered correlation matrix of H3K27ac CUT&RUN profiles in Hct116 cells.** Correlation  
 28 matrix of three replicates from Hct116 WT, Fbw7<sup>-/-</sup> (Del) and Fbw7<sup>R/+</sup> (R) cells. IgG negative control for each cell  
 29 type included. Peaks from the three cell types were merged to create a final peak-set to perform the correlation  
 30 analysis.

31

32

33 **Figure 2 – figure supplement 2**

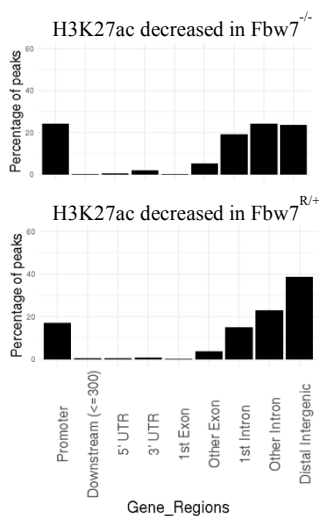

34

35 **Percentage of peaks with decreased H3K27ac signal located within different gene features.** Compared to non-  
 36 differential H3K27ac peaks, differential H3K27ac peaks enrich mostly within introns and intergenic regions (p value  
 37 < 0.0001, Fisher test).

38

39

40

41

42 **Figure 2 – figure supplement 3**

43

**A**

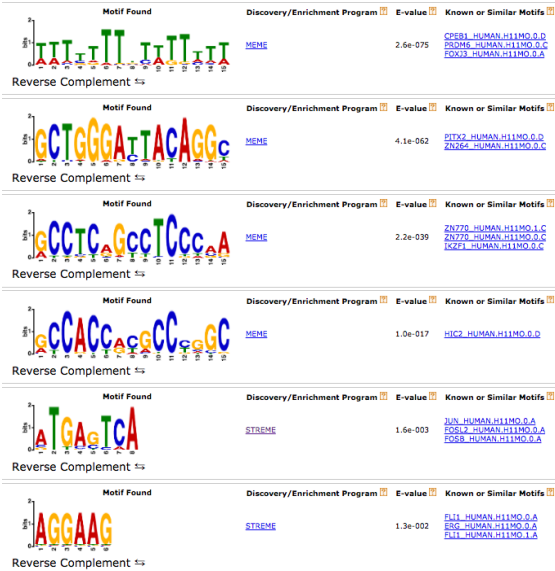

**B**

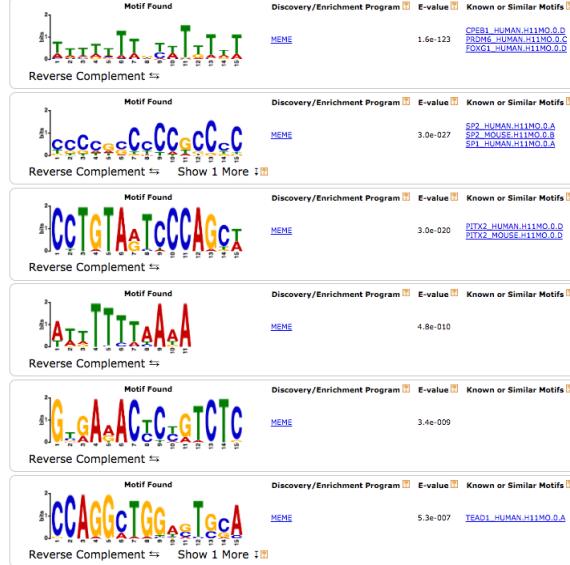

44

45 **Complete output of the MEME-ChIP analysis on H3K27ac differential sites.** (A) MEME-ChIP analysis on the  
 46 sequences of H3K27ac increased sites in Fbw7<sup>-/-</sup> cells. (B) MEME-ChIP analysis on the sequences of non-  
 47 differential H3K27ac sites in Fbw7<sup>-/-</sup> cells (negative control, 1409 sites).

48 \*FIMO analysis revealed that AP-1 motif was enriched in approximately 30-35% of H3K27ac sites that were  
 49 decreased in Fbw7<sup>-/-</sup> (p value ≤ 1.8e-5), increased in Fbw7<sup>R/+</sup> (30.2% p value = 1.8e-5), decreased in Fbw7<sup>R/+</sup> (35% p  
 50 value ≤ 1.5e-5), however only 17% in non-differential sites (1409 sites) (p value ≤ 1.8e-5).



51 **Figure 3 – figure supplement 1**

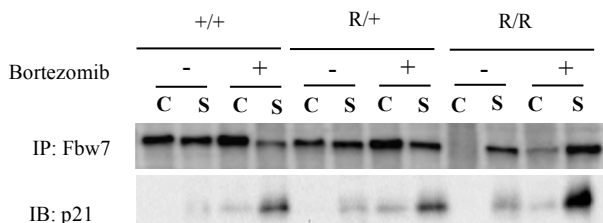

52  
 53 **Fbw7 abundance in chromatin (C) and soluble (S) fractions from Hct116 WT, Fbw7<sup>R/+</sup> and Fbw7<sup>R/R</sup> cells**  
 54 **treated with and without Bortezomib.**

56 **Figure 3 – figure supplement 2**

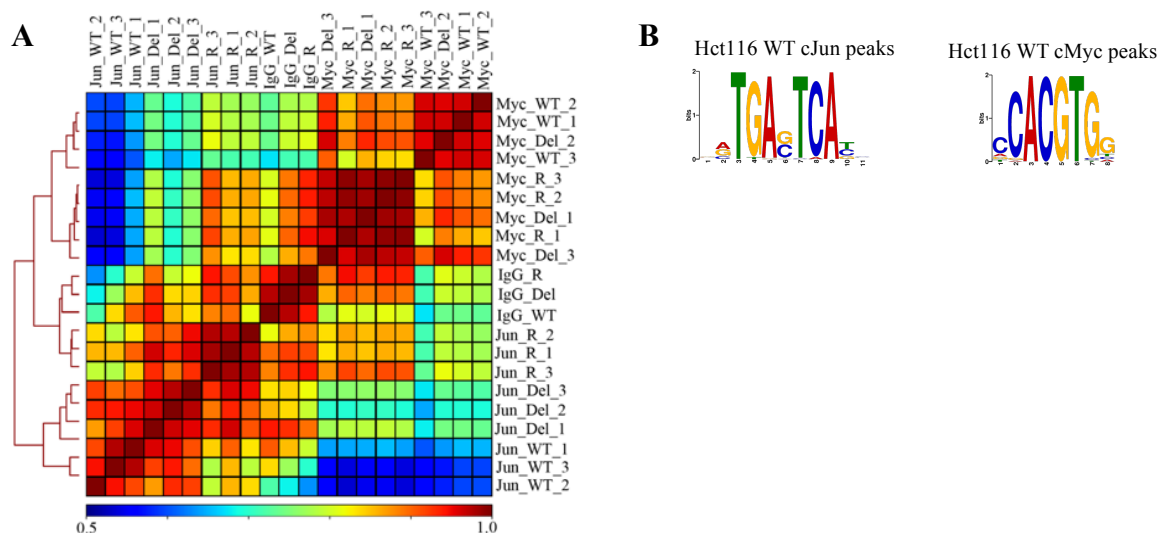

58  
 59 **Validation of Jun and Myc CUT&RUN profiles.**

60 (A) Hierarchically clustered correlation matrix of Jun and Myc signal mapped in Hct116 WT, Fbw7<sup>-/-</sup> (Del) and  
 61 Fbw7<sup>R/+</sup> (R) cells. IgG negative control for each cell type included. Peaks from the three cell types were  
 62 merged to create a final peak-set. (B) Sequence logo of the AP-1 motif enriched in the center 100bp  
 63 sequence of Jun peaks in Hct116 WT (E value 1.3e-53) and sequence logo of E-box motif enriched in the  
 64 center 100bp sequence of Myc peaks in Hct116 WT (1.7e-4). AP-1 motif was input to FIMO to scan for the  
 65 motif in full sequence of 25,527 Jun peaks in Hct116 WT. FIMO output showed that motifs with score  
 66 between 15.73 to 12.11 occurred 26,547 times (p value ≤ 6.46E-05). E-box motif was input to FIMO to scan  
 67 for the motif in full sequence of 24,111 Myc peaks in Hct116 WT. FIMO output showed that motifs with  
 68 score between 15.32 – 9.24 occurred 9343 times (p value ≤ 0.00024). Motif score range was determined by  
 69 the exact similarity to TGAG/CTCA (AP-1 motif) or CACGTG (E box).

71 **Figure 3 – figure supplement 3**

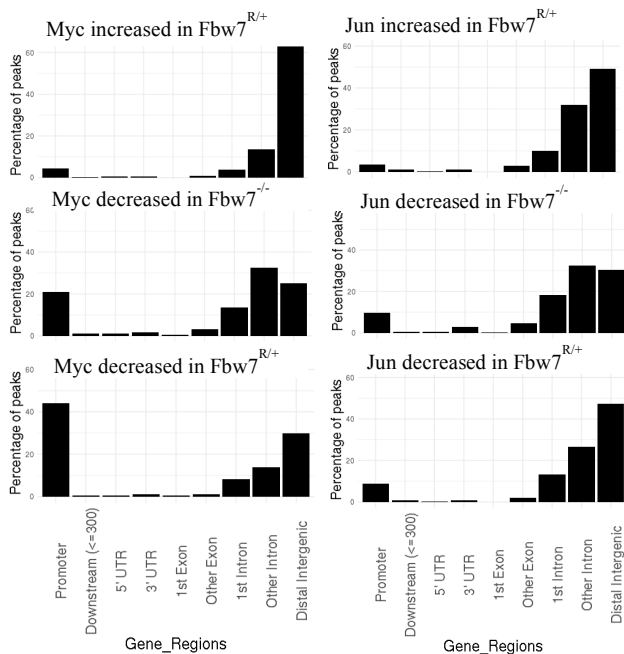

72

73 **Percentage of Myc and Jun peaks located at different gene features.**

74

75

76

77

78

79

80

81

82

83

84

85

86

87

88

89

90 **Figure 3 – figure supplement 4**

91

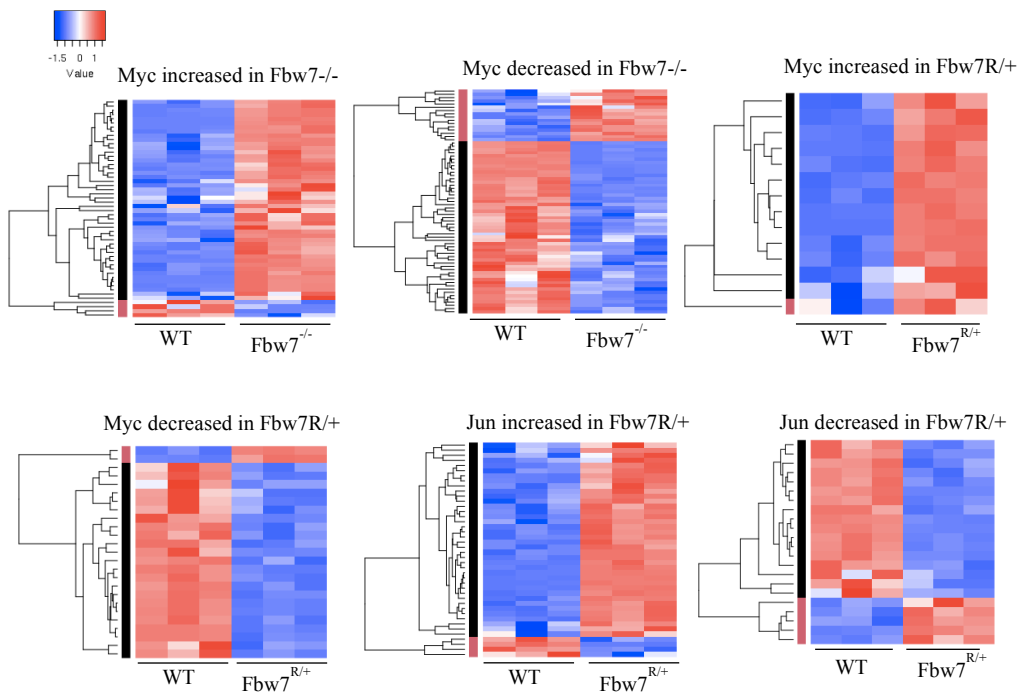

92

93 **Transcription of genes with differential promoter proximal Myc and Jun occupancy in *Fbw7* mutant cells.**

94 Hierarchically clustered genes showing the transcription of genes that have increased or decreased Myc and Jun

95 occupancy at gene proximal sites in *Fbw7*<sup>-/-</sup> and *Fbw7*<sup>R/+</sup> cells.

96

97 **Figure 4 – figure supplement 1**

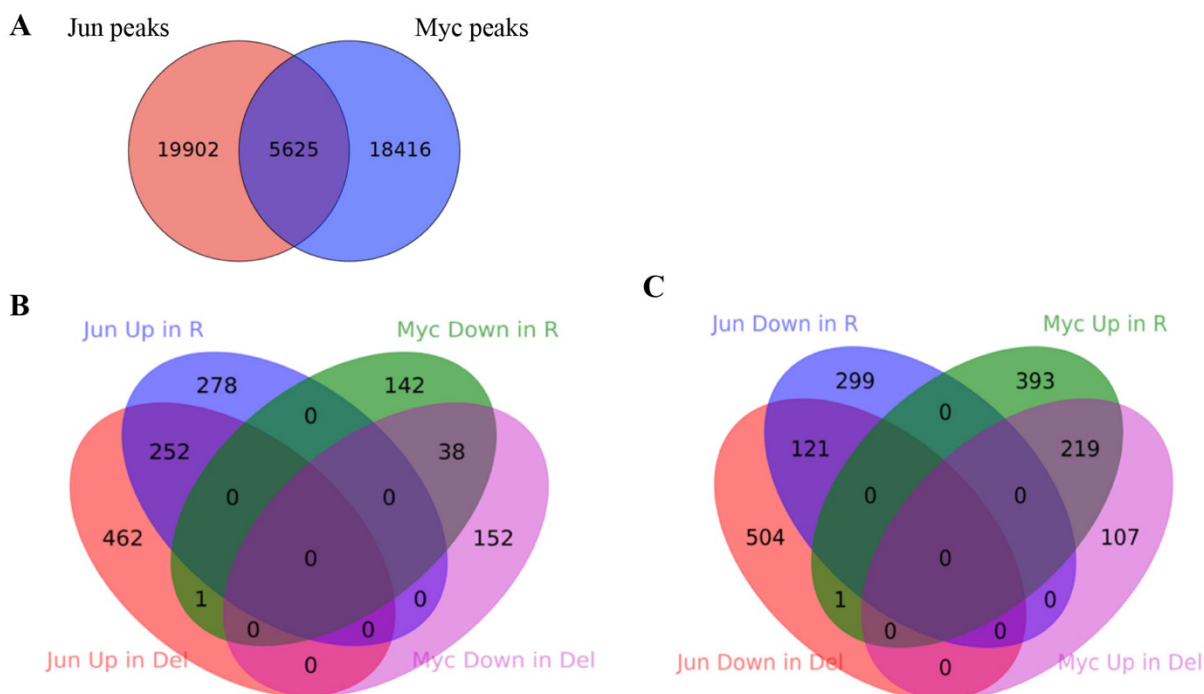

98 **Comparison between Jun and Myc peaks in Hct116 cells** (A) The overlap between Jun and Myc peaks in Hct116  
 99 WT cells. (p value < 0.0001, Fisher Test) (B) The overlap between peaks with increased Jun occupancy in Fbw7<sup>-/-</sup>  
 100 and Fbw7<sup>R/+</sup> cells, and decreased Myc occupancy in Fbw7<sup>-/-</sup> and Fbw7<sup>R/+</sup> cells (C) The overlap between decreased  
 101 Jun occupancy in Fbw7<sup>-/-</sup> and Fbw7<sup>R/+</sup> cells, and increased Myc occupancy in Fbw7<sup>-/-</sup> and Fbw7<sup>R/+</sup> cells.

102

103 **Figure 5 – figure supplement 1**

104

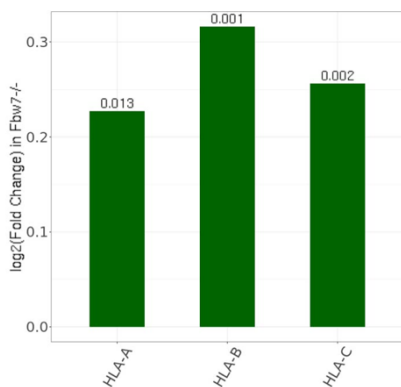

105 **Expression fold change of MHC Class I genes in Hct116 Fbw7<sup>-/-</sup> with respect to WT cells.** FDR values are  
 106 indicated at top of each bar. n = 3

107 **Figure 6 – figure supplement 1**

108

109

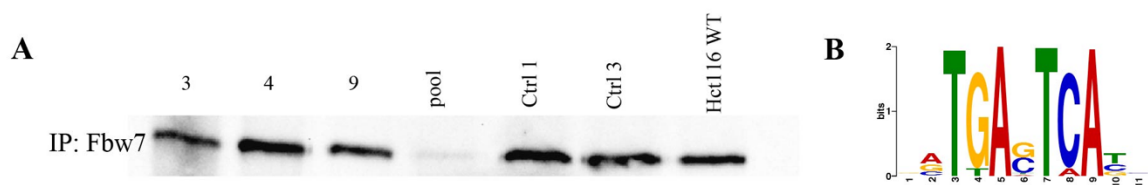

110

111 **Validation of U5-NSC Fbw7<sup>-/-</sup> generation and CUT&RUN Jun signal (A)** Western blot showing Fbw7; samples

112 1-4: U5 NSCs with sgRNA targeting Fbw7 exon 3, 4, 9 and all three exons in one pool; samples 5-6: U5 NSCs with

113 control sgRNA 1x and 3x; and sample 7: Hct116 WT. (B) Sequence logo of AP-1 motif enriched in Jun peaks in U5

114 NSCs (E value = 1.2e-146).

115

116

117 **Figure 6 – figure supplement 2**

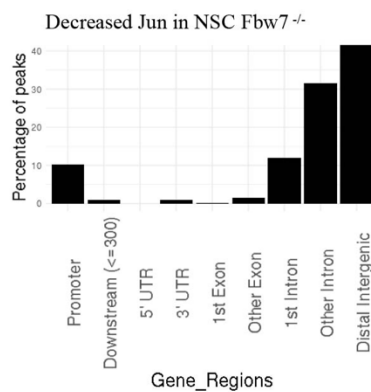

118 **Percentage of peaks with decreased Jun in U5 NSC Fbw7<sup>-/-</sup> within different gene regions**

119

120

121 **Figure 6 – figure supplement 3**

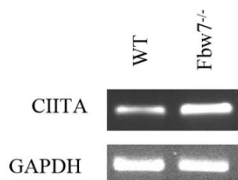

122 **CIITA isoform III amplified using isoform specific primers in U5 NSCs.**
